# Supplementary material
Source: MDPI journal article supplement (https://www.mdpi.com/2076-3263/11/3/135)

# $\Delta_{47}$ Analysis Report — N. Beaudoin

Laboratoire des Sciences du Climat et de l'Environnement  
Compiled by M. Daëron ([daeron@lsce.ipsl.fr](mailto:daeron@lsce.ipsl.fr)) on 2020/09/23

|                                                                               |                          |
|-------------------------------------------------------------------------------|--------------------------|
| Number of analytical sessions                                                 | 3                        |
| Number of samples (standards + unknowns)                                      | 21 (3 + 18)              |
| Number of analyses (standards + unknowns)                                     | 105 (59+ 46)             |
| Overall percentage of standard analyses                                       | 56 %                     |
| Nominal $\Delta_{47}$ of standard ETH-1:                                      | 0.2580 ‰                 |
| Nominal $\Delta_{47}$ of standard ETH-2:                                      | 0.2560 ‰                 |
| Nominal $\Delta_{47}$ of standard ETH-3:                                      | 0.6910 ‰                 |
| External reproducibility of $\delta^{13}\text{C}_{\text{VPDB}}$ measurements  | 8.0 ppm                  |
| External reproducibility of $\delta^{18}\text{O}_{\text{VSMOW}}$ measurements | 22.1 ppm                 |
| External reproducibility of $\Delta_{47}$ measurements                        | 9.5 ppm                  |
| Regression model degrees of freedom                                           | 78 ( $t_{95\%} = 1.99$ ) |

## Analytical sessions

| Session                                            |                          | 2020-08            | 2020-09a           | 2020-09c           |
|----------------------------------------------------|--------------------------|--------------------|--------------------|--------------------|
| N of standard analyses                             |                          | 24                 | 22                 | 13                 |
| N of unknown analyses                              |                          | 18                 | 18                 | 10                 |
| Working gas $\delta^{13}\text{C}$                  | (‰ VPDB)                 | −3.77              | −3.78              | −3.78              |
| Working gas $\delta^{18}\text{O}$                  | (‰ VSMOW)                | 35.16              | 35.15              | 35.11              |
| Working gas $\Delta_{47}$                          | (‰ ± SE)                 | $1.057 \pm 0.012$  | $1.057 \pm 0.013$  | $1.044 \pm 0.018$  |
| Scrambling factor (a)                              | (± SE)                   | $0.906 \pm 0.010$  | $0.895 \pm 0.010$  | $0.907 \pm 0.014$  |
| Compositional slope (b)                            | ( $\times 10^{-4}$ ± SE) | $0.5 \pm 1.6$      | $0.3 \pm 1.5$      | $1.0 \pm 2.2$      |
| Working gas offset (c)                             | (± SE)                   | $-0.958 \pm 0.005$ | $-0.946 \pm 0.005$ | $-0.947 \pm 0.007$ |
| $\delta^{13}\text{C}_{\text{VPDB}}$ repeatability  | (ppm)                    | 7.6                | 4.9                | 10.6               |
| $\delta^{18}\text{O}_{\text{VSMOW}}$ repeatability | (ppm)                    | 19.3               | 20.1               | 21.4               |
| $\Delta_{47}$ repeatability                        | (ppm)                    | 11.4               | 10.2               | 10.7               |

| Sample           | N  | Yield<br>(%) | $\delta^{13}\text{C}_{\text{VPDB}}$ | $\delta^{18}\text{O}_{\text{VSMOW}}$<br>(CO <sub>2</sub> ) | $\delta^{18}\text{O}_{\text{VPDB}}$<br>(calcite*) | $\Delta_{47}$ |               |                 | p-value<br>(Levene) |
|------------------|----|--------------|-------------------------------------|------------------------------------------------------------|---------------------------------------------------|---------------|---------------|-----------------|---------------------|
|                  |    |              |                                     |                                                            |                                                   | $\pm$ SE      | ( $\pm$ 95 %) | SD              |                     |
| ETH-1            | 18 | 100.5        | 2.05                                | 37.05                                                      | -2.17                                             | 0.2580        |               | 0.0085          |                     |
| ETH-2            | 18 | 99.5         | -10.13                              | 19.89                                                      | -18.68                                            | 0.2560        |               | 0.0142          |                     |
| ETH-3            | 23 | 96.1         | 1.71                                | 37.45                                                      | -1.78                                             | 0.6910        |               | 0.0075          |                     |
| NB_A10_V1        | 3  | 97.4         | 2.58                                | 35.83                                                      | -3.34                                             | 0.5894        | $\pm$ 0.0057  | ( $\pm$ 0.0114) | 0.649               |
| NB_A14_V1        | 3  | 93.2         | 3.08                                | 39.76                                                      | 0.45                                              | 0.6283        | $\pm$ 0.0058  | ( $\pm$ 0.0115) | 0.616               |
| NB_CIN23_V1      | 3  | 97.7         | 1.77                                | 38.89                                                      | -0.40                                             | 0.6299        | $\pm$ 0.0058  | ( $\pm$ 0.0115) | 0.344               |
| NB_CIN25_FAILLE  | 3  | 99.1         | 2.01                                | 41.14                                                      | 1.77                                              | 0.5985        | $\pm$ 0.0058  | ( $\pm$ 0.0115) | 0.405               |
| NB_CIN25_V1prime | 3  | 97.0         | 1.93                                | 41.05                                                      | 1.68                                              | 0.6006        | $\pm$ 0.0058  | ( $\pm$ 0.0115) | 0.792               |
| NB_CIN26_V1      | 3  | 99.2         | 1.92                                | 41.51                                                      | 2.13                                              | 0.5933        | $\pm$ 0.0058  | ( $\pm$ 0.0115) | 0.262               |
| NB_CIN27_V1      | 3  | 96.4         | 1.26                                | 38.83                                                      | -0.45                                             | 0.6220        | $\pm$ 0.0058  | ( $\pm$ 0.0115) | 0.618               |
| NB_CIN28a_V1     | 3  | 99.9         | 1.73                                | 39.27                                                      | -0.03                                             | 0.5968        | $\pm$ 0.0057  | ( $\pm$ 0.0114) | 0.788               |
| NB_CIN28b_V1     | 3  | 90.4         | 2.01                                | 41.33                                                      | 1.95                                              | 0.5944        | $\pm$ 0.0058  | ( $\pm$ 0.0115) | 0.354               |
| NB_CIN7_V1       | 3  | 96.5         | 2.44                                | 40.19                                                      | 0.86                                              | 0.6103        | $\pm$ 0.0058  | ( $\pm$ 0.0115) | 0.185               |
| NO_LABEL_01      | 2  | 95.2         | 2.15                                | 33.75                                                      | -5.34                                             | 0.5184        | $\pm$ 0.0069  | ( $\pm$ 0.0137) | 0.0065              |
| NO_LABEL_02      | 2  | 94.9         | 2.43                                | 32.96                                                      | -6.10                                             | 0.5140        | $\pm$ 0.0069  | ( $\pm$ 0.0137) | 0.0026              |
| NO_LABEL_03      | 2  | 95.5         | 2.65                                | 33.64                                                      | -5.45                                             | 0.5228        | $\pm$ 0.0069  | ( $\pm$ 0.0137) | 0.0004              |
| NO_LABEL_04      | 2  | 94.5         | 2.68                                | 33.81                                                      | -5.28                                             | 0.5437        | $\pm$ 0.0069  | ( $\pm$ 0.0138) | 0.0017              |
| NO_LABEL_05      | 2  | 78.0         | 0.04                                | 35.89                                                      | -3.28                                             | 0.5855        | $\pm$ 0.0069  | ( $\pm$ 0.0138) | 0.0004              |
| NO_LABEL_06      | 2  | 95.2         | 1.75                                | 34.50                                                      | -4.62                                             | 0.5650        | $\pm$ 0.0069  | ( $\pm$ 0.0138) | 0.0089              |
| NO_LABEL_07      | 2  | 97.8         | 2.72                                | 32.77                                                      | -6.28                                             | 0.4976        | $\pm$ 0.0069  | ( $\pm$ 0.0137) | 0.0088              |
| NO_LABEL_08      | 2  | 97.1         | 2.66                                | 33.86                                                      | -5.23                                             | 0.4741        | $\pm$ 0.0069  | ( $\pm$ 0.0137) | 0.0031              |

\* computed assuming the sample is pure calcite; adjust accordingly for different mineralogies.

For example, for aragonite samples,  $\delta^{18}\text{O}_{\text{arag}} = (1000 + \delta^{18}\text{O}_{\text{calcite}}) \times 1.00813 / {}^{18}\alpha_{\text{arag}} - 1000$

| Sample           | N | $\delta^{13}\text{C}_{\text{VPDB}}$ | $\delta^{18}\text{O}_{\text{VPDB}}$ | $\Delta_{47}$       | $T_{47}$        |
|------------------|---|-------------------------------------|-------------------------------------|---------------------|-----------------|
|                  |   | (‰)                                 | (‰, calcite)                        | (‰ $\pm$ 1SE)       | (°C, $\pm$ 1SE) |
| NB_A10_V1        | 3 | 2.58                                | -3.34                               | 0.5894 $\pm$ 0.0057 | 52.9 $\pm$ 2.2  |
| NB_A14_V1        | 3 | 3.08                                | 0.45                                | 0.6283 $\pm$ 0.0058 | 38.8 $\pm$ 2.0  |
| NB_CIN23_V1      | 3 | 1.77                                | -0.40                               | 0.6299 $\pm$ 0.0058 | 38.3 $\pm$ 1.9  |
| NB_CIN25_FAILLE  | 3 | 2.01                                | 1.77                                | 0.5985 $\pm$ 0.0058 | 49.4 $\pm$ 2.2  |
| NB_CIN25_V1prime | 3 | 1.93                                | 1.68                                | 0.6006 $\pm$ 0.0058 | 48.7 $\pm$ 2.1  |
| NB_CIN26_V1      | 3 | 1.92                                | 2.13                                | 0.5933 $\pm$ 0.0058 | 51.4 $\pm$ 2.2  |
| NB_CIN27_V1      | 3 | 1.26                                | -0.45                               | 0.6220 $\pm$ 0.0058 | 41.0 $\pm$ 2.0  |
| NB_CIN28a_V1     | 3 | 1.73                                | -0.03                               | 0.5968 $\pm$ 0.0057 | 50.0 $\pm$ 2.2  |
| NB_CIN28b_V1     | 3 | 2.01                                | 1.95                                | 0.5944 $\pm$ 0.0058 | 51.0 $\pm$ 2.2  |
| NB_CIN7_V1       | 3 | 2.44                                | 0.86                                | 0.6103 $\pm$ 0.0058 | 45.1 $\pm$ 2.1  |

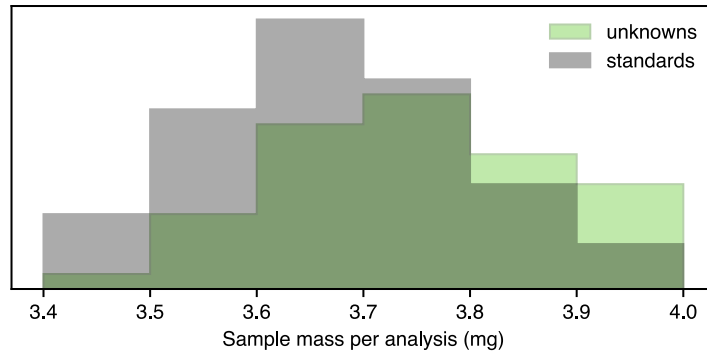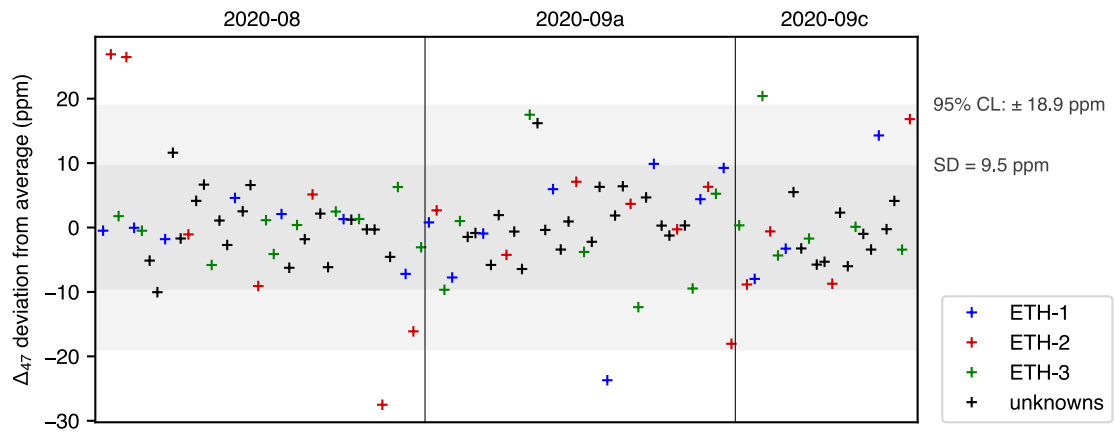

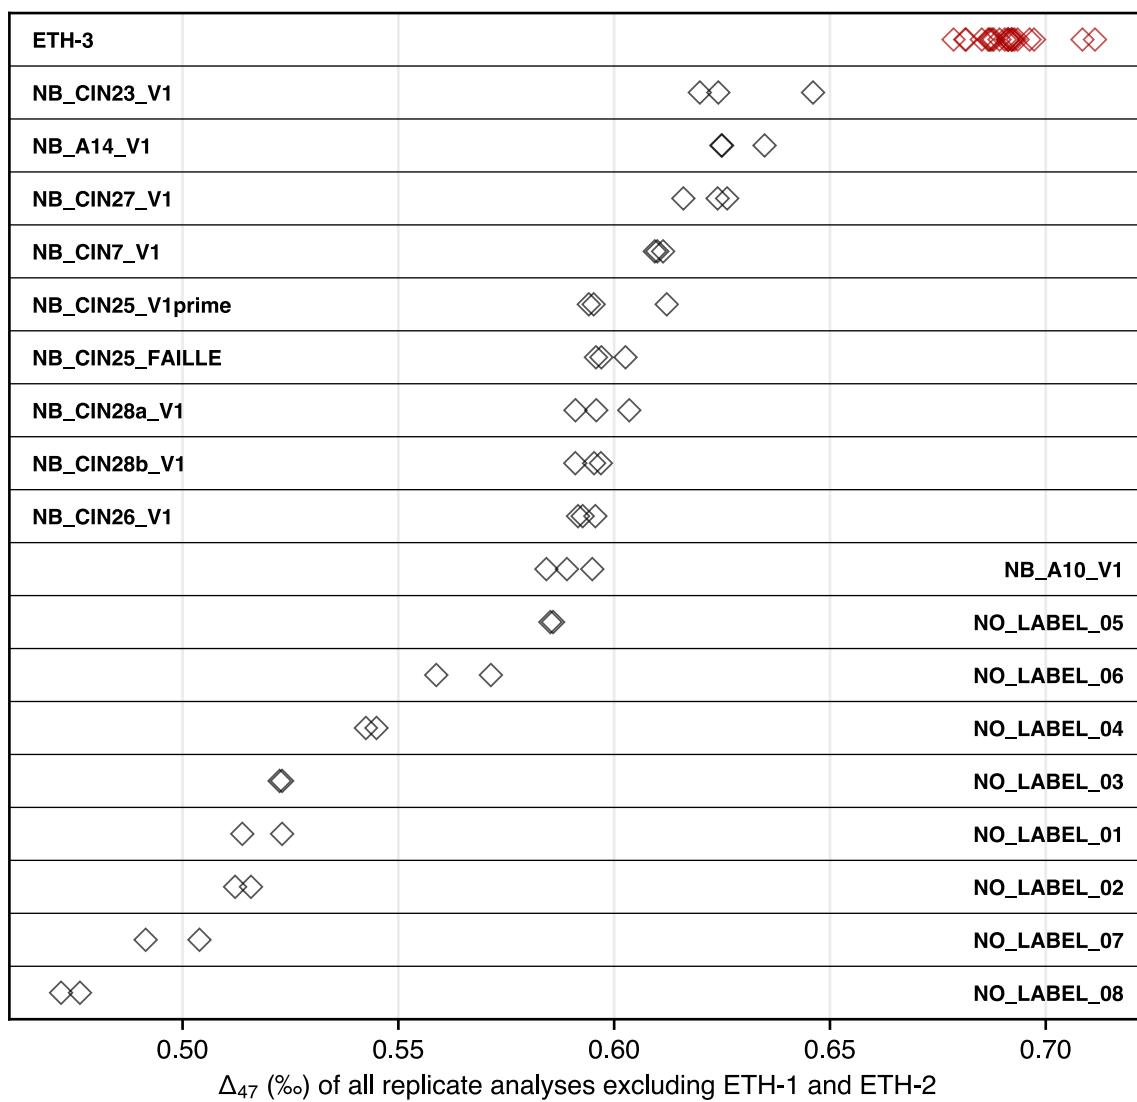

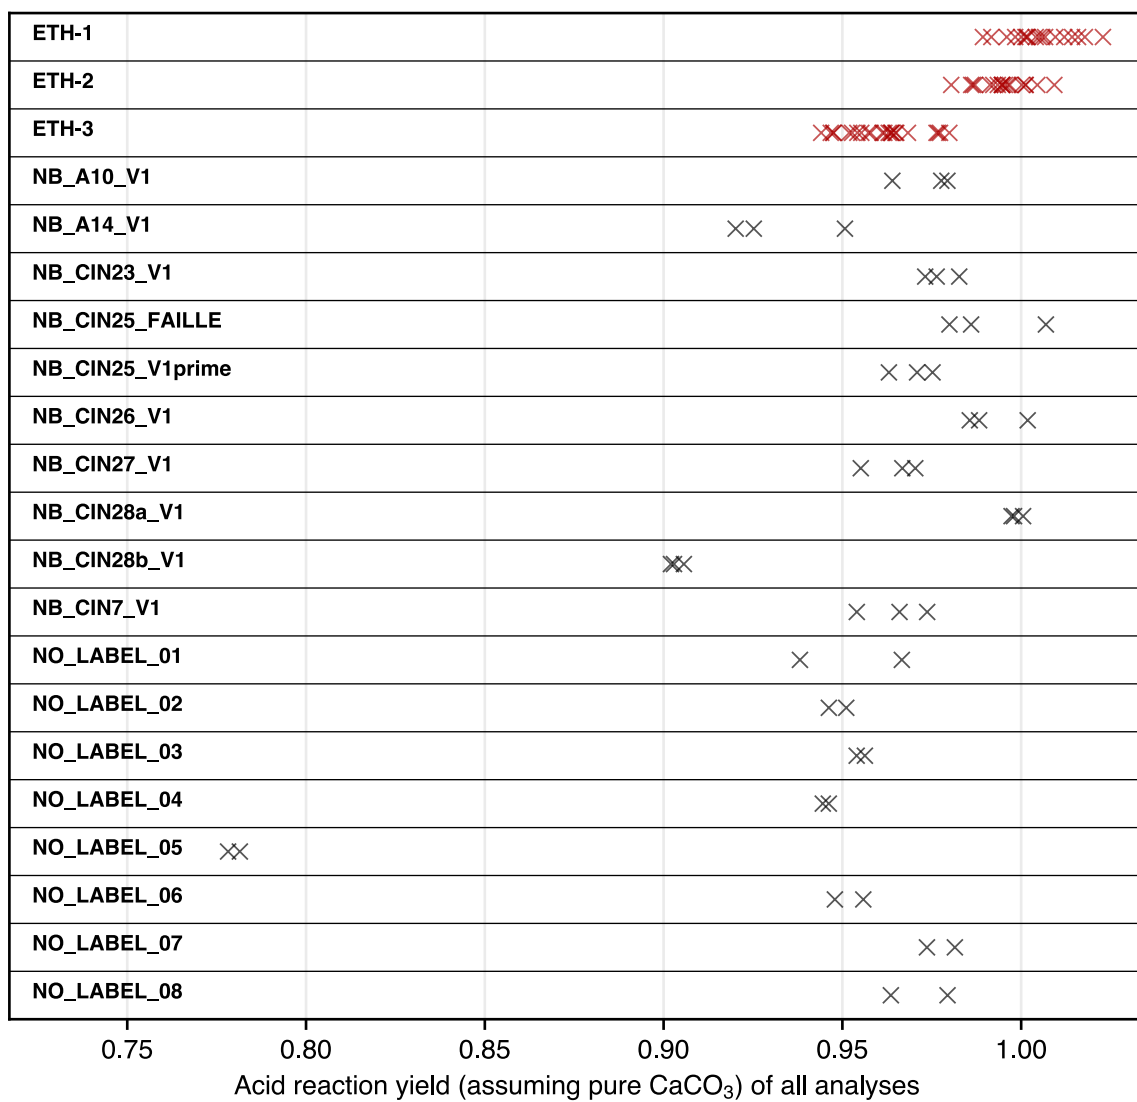

| UID  | Session  | Sample           | Mass<br>(mg) | CO <sub>2</sub> yield<br>(if CaCO <sub>3</sub> ) | δ45<br>(‰ WG) | δ46<br>(‰ WG) | δ47<br>(‰ WG) | δ48<br>(‰ WG) | δ49<br>(‰ WG) | Δ <sub>47</sub> <sup>raw</sup><br>(‰) | Δ <sub>48</sub> <sup>ab</sup><br>(‰) |
|------|----------|------------------|--------------|--------------------------------------------------|---------------|---------------|---------------|---------------|---------------|---------------------------------------|--------------------------------------|
| H367 | 2020-08  | ETH-1            | 3.59         | 1.00                                             | 5.528531      | 1.925474      | 6.878381      | 3.524230      | 0.931849      | -0.724165                             | 0.257508                             |
| H368 | 2020-08  | ETH-2            | 3.57         | 1.00                                             | -6.477421     | -14.675544    | -21.703548    | -29.025750    | 0.094865      | -0.702734                             | 0.282884                             |
| H369 | 2020-08  | ETH-3            | 3.58         | 0.96                                             | 5.223969      | 2.298445      | 7.329638      | 4.481268      | 0.725318      | -0.329717                             | 0.692768                             |
| H370 | 2020-08  | ETH-2            | 3.53         | 0.99                                             | -6.478699     | -14.702052    | -21.731104    | -29.193395    | 0.216286      | -0.703126                             | 0.282452                             |
| H371 | 2020-08  | ETH-1            | 3.55         | 1.00                                             | 5.525900      | 1.917222      | 6.867921      | 3.457606      | 0.618959      | -0.723758                             | 0.257958                             |
| H372 | 2020-08  | ETH-3            | 3.57         | 0.96                                             | 5.232054      | 2.310000      | 7.347347      | 4.474052      | 0.644202      | -0.331768                             | 0.690503                             |
| H373 | 2020-08  | NB_A10_V1        | 3.61         | 0.98                                             | 5.981830      | 0.722994      | 6.456086      | 1.329537      | 0.779461      | -0.428057                             | 0.584298                             |
| H374 | 2020-08  | NB_CIN23_V1      | 3.70         | 0.98                                             | 5.311947      | 3.604778      | 8.644894      | 6.952187      | 1.395709      | -0.395722                             | 0.619849                             |
| H375 | 2020-08  | ETH-1            | 3.76         | 1.02                                             | 5.527386      | 1.880301      | 6.831364      | 3.421852      | 1.607769      | -0.725357                             | 0.256196                             |
| H376 | 2020-08  | NB_CIN25_V1prime | 3.80         | 0.98                                             | 5.541863      | 5.779653      | 11.025450     | 11.417095     | 1.122045      | -0.402539                             | 0.612183                             |
| H377 | 2020-08  | NB_CIN26_V1      | 3.67         | 1.00                                             | 5.557170      | 6.224578      | 11.462220     | 12.279870     | 1.473510      | -0.421141                             | 0.591629                             |
| H378 | 2020-08  | ETH-2            | 3.67         | 1.00                                             | -6.478932     | -14.714344    | -21.767756    | -29.262868    | 0.051959      | -0.728067                             | 0.254931                             |
| H379 | 2020-08  | NB_CIN27_V1      | 3.65         | 0.97                                             | 4.842941      | 3.571806      | 8.132632      | 6.963285      | 1.140672      | -0.390015                             | 0.626178                             |
| H380 | 2020-08  | NB_CIN28a_V1     | 3.71         | 1.00                                             | 5.285433      | 3.989552      | 8.982698      | 7.751279      | 0.679634      | -0.410523                             | 0.603495                             |
| H381 | 2020-08  | ETH-3            | 3.42         | 0.95                                             | 5.229322      | 2.238637      | 7.269144      | 4.378538      | 1.120824      | -0.336593                             | 0.685183                             |
| H382 | 2020-08  | NB_CIN7_V1       | 3.90         | 0.97                                             | 6.006890      | 4.959945      | 10.696529     | 9.706857      | 2.582629      | -0.403322                             | 0.611339                             |
| H383 | 2020-08  | NB_CIN25_FAILLE  | 3.64         | 0.98                                             | 5.621662      | 5.722232      | 11.036441     | 11.165945     | 0.971126      | -0.417401                             | 0.595782                             |
| H384 | 2020-08  | ETH-1            | 3.68         | 1.01                                             | 5.528840      | 1.869804      | 6.828336      | 3.476914      | 1.217816      | -0.719560                             | 0.262594                             |
| H385 | 2020-08  | NB_CIN28b_V1     | 3.74         | 0.91                                             | 5.625954      | 5.976110      | 11.296654     | 11.810001     | 1.346188      | -0.416350                             | 0.596925                             |
| H386 | 2020-08  | NB_A14_V1        | 3.71         | 0.93                                             | 6.586202      | 4.453808      | 10.817748     | 8.782502      | 1.491565      | -0.382007                             | 0.634853                             |
| H387 | 2020-08  | ETH-2            | 3.65         | 0.99                                             | -6.481207     | -14.751455    | -21.813402    | -29.317529    | 0.760936      | -0.735332                             | 0.246916                             |
| H388 | 2020-08  | ETH-3            | 3.84         | 0.98                                             | 5.218250      | 2.247632      | 7.272935      | 4.274070      | 1.043423      | -0.330293                             | 0.692135                             |
| H389 | 2020-08  | ETH-3            | 3.64         | 0.96                                             | 5.221677      | 2.212046      | 7.236515      | 4.228497      | 0.728895      | -0.335057                             | 0.686880                             |
| H392 | 2020-08  | ETH-1            | 3.58         | 1.00                                             | 5.529122      | 1.822216      | 6.779322      | 3.383818      | 1.299062      | -0.721828                             | 0.260093                             |
| H394 | 2020-08  | NO_LABEL_06      | 3.95         | 0.96                                             | 5.157366      | -0.634975     | 4.240146      | -1.349927     | 1.505617      | -0.451301                             | 0.558782                             |
| H395 | 2020-08  | ETH-3            | 3.48         | 0.95                                             | 5.224293      | 2.205928      | 7.237290      | 4.197237      | 0.205965      | -0.330972                             | 0.691388                             |
| H396 | 2020-08  | NO_LABEL_02      | 3.90         | 0.95                                             | 5.750395      | -2.115059     | 3.345616      | -4.370040     | 1.504252      | -0.493589                             | 0.512170                             |
| H398 | 2020-08  | ETH-2            | 3.85         | 1.00                                             | -6.479774     | -14.774406    | -21.821740    | -29.289912    | 0.238859      | -0.722451                             | 0.261131                             |
| H399 | 2020-08  | NO_LABEL_08      | 3.81         | 0.96                                             | 5.994022      | -1.252867     | 4.416233      | -2.624319     | 1.488860      | -0.526105                             | 0.476223                             |
| H400 | 2020-08  | NO_LABEL_07      | 3.82         | 0.97                                             | 6.004967      | -2.323296     | 3.382812      | -4.887055     | 0.594974      | -0.512365                             | 0.491447                             |
| H401 | 2020-08  | ETH-3            | 3.88         | 0.96                                             | 5.221665      | 2.191622      | 7.222341      | 4.275985      | 1.865612      | -0.329083                             | 0.693474                             |
| H404 | 2020-08  | ETH-1            | 3.73         | 1.00                                             | 5.523331      | 1.810179      | 6.760725      | 3.294831      | 1.828492      | -0.722545                             | 0.259303                             |
| H406 | 2020-08  | NO_LABEL_04      | 3.75         | 0.94                                             | 6.014420      | -1.297000     | 4.456173      | -2.830433     | 1.144365      | -0.463838                             | 0.544934                             |
| H407 | 2020-08  | ETH-3            | 3.60         | 0.95                                             | 5.213029      | 2.181414      | 7.202273      | 4.318943      | 0.992264      | -0.330129                             | 0.692320                             |
| H408 | 2020-08  | NO_LABEL_03      | 3.45         | 0.96                                             | 5.972498      | -1.497959     | 4.193817      | -3.175300     | 0.955249      | -0.484202                             | 0.522478                             |
| H409 | 2020-08  | NO_LABEL_05      | 3.72         | 0.78                                             | 3.599401      | 0.658271      | 3.934122      | 1.041315      | -1.136493     | -0.427367                             | 0.585212                             |
| H410 | 2020-08  | ETH-2            | 3.81         | 0.99                                             | -6.485631     | -14.803922    | -21.885458    | -29.575739    | 1.705034      | -0.752036                             | 0.228488                             |
| H412 | 2020-08  | NO_LABEL_01      | 3.53         | 0.94                                             | 5.501600      | -1.384632     | 3.813053      | -2.980995     | 0.304406      | -0.492055                             | 0.513835                             |
| H413 | 2020-08  | ETH-3            | 3.62         | 0.95                                             | 5.197045      | 2.168440      | 7.177462      | 4.273793      | 0.748808      | -0.325632                             | 0.697285                             |
| H414 | 2020-08  | ETH-1            | 3.64         | 0.99                                             | 5.520559      | 1.795695      | 6.735784      | 3.320186      | 2.233381      | -0.730254                             | 0.250798                             |
| H415 | 2020-08  | ETH-2            | 3.74         | 0.99                                             | -6.491912     | -14.823483    | -21.900825    | -29.581452    | 0.427656      | -0.741711                             | 0.239883                             |
| H416 | 2020-08  | ETH-3            | 3.63         | 0.94                                             | 5.200608      | 2.155785      | 7.160099      | 4.151914      | 0.645472      | -0.334110                             | 0.687930                             |
| H418 | 2020-09a | ETH-1            | 3.63         | 1.02                                             | 5.534701      | 1.933454      | 6.902714      | 3.687730      | 1.615078      | -0.714169                             | 0.258792                             |
| H419 | 2020-09a | ETH-2            | 3.75         | 1.01                                             | -6.467538     | -14.662715    | -21.693192    | -29.418866    | 0.248371      | -0.715203                             | 0.258661                             |
| H420 | 2020-09a | ETH-3            | 3.91         | 0.96                                             | 5.237480      | 2.278234      | 7.317435      | 4.364283      | 1.392821      | -0.335869                             | 0.681336                             |
| H421 | 2020-09a | ETH-1            | 3.74         | 1.00                                             | 5.531837      | 1.896492      | 6.855520      | 3.437363      | 1.623491      | -0.721824                             | 0.250243                             |
| H423 | 2020-09a | ETH-3            | 3.63         | 0.98                                             | 5.236510      | 2.291642      | 7.339302      | 4.491684      | 1.428155      | -0.326321                             | 0.692001                             |
| H424 | 2020-09a | NB_CIN25_FAILLE  | 3.97         | 0.99                                             | 5.629983      | 5.914993      | 11.241849     | 11.743723     | 0.956832      | -0.411213                             | 0.597037                             |
| H425 | 2020-09a | NB_CIN7_V1       | 3.90         | 0.95                                             | 6.008225      | 4.904086      | 10.645878     | 9.666258      | 0.495157      | -0.400159                             | 0.609405                             |
| H426 | 2020-09a | ETH-1            | 3.89         | 1.00                                             | 5.531983      | 1.876245      | 6.841823      | 3.552813      | 0.872241      | -0.715713                             | 0.257069                             |
| H427 | 2020-09a | NB_CIN28a_V1     | 3.71         | 1.00                                             | 5.319957      | 4.067486      | 9.089255      | 8.004497      | 1.417849      | -0.416661                             | 0.591028                             |
| H428 | 2020-09a | NB_CIN27_V1      | 3.53         | 0.96                                             | 4.842122      | 3.587947      | 8.150562      | 7.100483      | 0.853828      | -0.387203                             | 0.623967                             |
| H429 | 2020-09a | ETH-2            | 3.74         | 1.00                                             | -6.471345     | -14.737771    | -21.776375    | -29.609161    | 1.337068      | -0.721386                             | 0.251758                             |
| H430 | 2020-09a | NB_CIN26_V1      | 3.72         | 0.99                                             | 5.559045      | 6.162432      | 11.408877     | 12.216541     | 1.692812      | -0.415085                             | 0.592705                             |
| H431 | 2020-09a | NB_CIN25_V1prime | 3.64         | 0.96                                             | 5.547772      | 5.710713      | 10.952030     | 11.254219     | 1.222634      | -0.413826                             | 0.594128                             |
| H432 | 2020-09a | ETH-3            | 3.95         | 0.96                                             | 5.229608      | 2.256918      | 7.312744      | 4.425102      | 0.736197      | -0.311545                             | 0.708506                             |
| H433 | 2020-09a | NB_CIN23_V1      | 3.71         | 0.98                                             | 5.337291      | 3.726363      | 8.819871      | 7.304245      | 0.106396      | -0.367382                             | 0.646083                             |
| H434 | 2020-09a | NB_A10_V1        | 3.88         | 0.96                                             | 5.988808      | 0.676709      | 6.427131      | 1.236085      | 1.413622      | -0.418512                             | 0.589057                             |
| H435 | 2020-09a | ETH-1            | 3.59         | 1.01                                             | 5.530872      | 1.839999      | 6.811074      | 3.385702      | 0.909847      | -0.709547                             | 0.263957                             |
| H436 | 2020-09a | NB_A14_V1        | 3.83         | 0.92                                             | 6.582674      | 4.451634      | 10.807567     | 8.736800      | 1.865783      | -0.386335                             | 0.624841                             |
| H437 | 2020-09a | NB_CIN28b_V1     | 3.96         | 0.90                                             | 5.642613      | 5.964643      | 11.302498     | 11.874758     | 1.902264      | -0.412722                             | 0.595349                             |
| H438 | 2020-09a | ETH-2            | 3.49         | 0.99                                             | -6.474020     | -14.700291    | -21.732563    | -29.560190    | 0.461794      | -0.711227                             | 0.263103                             |
| H441 | 2020-09a | ETH-3            | 3.79         | 0.95                                             | 5.225715      | 2.242726      | 7.275484      | 4.364911      | 0.593044      | -0.330613                             | 0.687209                             |
| H442 | 2020-09a | NO_LABEL_08      | 3.82         | 0.98                                             | 5.983813      | -1.255736     | 4.405492      | -2.746090     | 1.006202      | -0.523507                             | 0.471850                             |
| H443 | 2020-09a | NO_LABEL_07      | 3.74         | 0.98                                             | 6.019046      | -2.300272     | 3.437664      | -4.952028     | 0.769470      | -0.494836                             | 0.503910                             |
| H444 | 2020-09a | ETH-1            | 3.76         | 1.00                                             | 5.527480      | 1.835267      | 6.776135      | 3.418504      | 0.413772      | -0.736107                             | 0.234291                             |
| H445 | 2020-09a | NO_LABEL_02      | 3.78         | 0.95                                             | 5.743618      | -2.142928     | 3.320561      | -4.608614     | 1.138755      | -0.484154                             | 0.515846                             |
| H446 | 2020-09a | NO_LABEL_06      | 3.72         | 0.95                                             | 5.155866      | -0.648722     | 4.242042      | -1.608673     | 0.793496      | -0.434358                             | 0.571435                             |
| H447 | 2020-09a | ETH-2            | 3.57         | 1.00                                             | -6.476093     | -14.769780    | -21.805508    | -29.650523    | 0.384061      | -0.714302                             | 0.259671                             |
| H450 | 2020-09a | ETH-3            | 3.63         | 0.96                                             | 5.228613      | 2.196373      | 7.224945      | 4.285115      | 0.142452      | -0.338287                             | 0.678639                             |
| H451 | 2020-09a | NO_LABEL_01      | 3.53         | 0.97                                             | 5.510533      | -1.373052     | 3.848134      | -3.031685     | 1.383102      | -0.477680                             | 0.523058                             |
| H453 | 2020-09a | ETH-1            | 3.54         | 1.01                                             | 5.528507      | 1.824392      | 6.796746      | 3.437052      | 0.422213      | -0.706037                             | 0.267879                             |
| H454 | 2020-09a | NO_LABEL_03      | 3.63         | 0.95                                             | 5.973684      | -1.472728     | 4.226564      | -3.213277     | 1.766393      | -0.477658                             | 0.523069                             |
| H455 | 2020-09a | NO_LABEL_04      | 3.60         | 0.95                                             | 6.010884      | -1.343504     | 4.410126      | -2.923455     | 0.194144      | -0.460274                             | 0.542480                             |
| H456 | 2020-09a | ETH-2            | 3.66         | 1.00                                             | -6.475609     | -14.793128    | -21.831268    | -29.842550    | 0.072785      | -0.717839                             | 0.255721                             |
| H457 | 2020-09a | NO_LABEL_05      | 3.98         | 0.78                                             | 3.607357      | 0.692583      | 3.982109      | 1.185239      | 0.520920      | -0.421463                             | 0.585847                             |
| H459 | 2020-09a | ETH-3            | 3.91         | 0.95                                             | 5.223604      | 2.194413      | 7.220439      | 4.161880      | 1.405144      | -0.335697                             | 0.681532                             |
| H462 | 2020-09a | ETH-1            | 3.88         | 0.99                                             | 5.523988      | 1.802153      | 6.765158      | 3.311630      | 1.507836      | -0.710948                             | 0.262394                             |
| H465 | 2020-09a | ETH-2            | 3.51         | 0.99                                             | -6.478721     | -14.776407    | -21.812326    | -29.911796    | -0.055433     | -0.711932                             | 0.262319                             |
| H468 | 2020-09a | ETH-3            | 3.50         | 0.97                                             | 5.212361      | 2.153957      | 7.182112      | 4.137852      | 1.341748      | -0.322527                             | 0.696245                             |

| UID  | Session  | Sample           | Mass<br>(mg) | CO <sub>2</sub> yield<br>(if CaCO <sub>3</sub> ) | δ45<br>(‰ WG) | δ46<br>(‰ WG) | δ47<br>(‰ WG) | δ48<br>(‰ WG) | δ49<br>(‰ WG) | Δ <sub>47</sub> <sup>raw</sup><br>(‰) | Δ <sub>47</sub> <sup>abs</sup><br>(‰) |
|------|----------|------------------|--------------|--------------------------------------------------|---------------|---------------|---------------|---------------|---------------|---------------------------------------|---------------------------------------|
| H469 | 2020-09a | ETH-1            | 3.64         | 1.00                                             | 5.527436      | 1.800339      | 6.771301      | 3.261717      | -0.016391     | -0.706606                             | 0.267245                              |
| H470 | 2020-09a | ETH-2            | 3.65         | 0.99                                             | -6.484409     | -14.820607    | -21.882605    | -30.078989    | 0.395770      | -0.733752                             | 0.237949                              |
| H526 | 2020-09c | ETH-3            | 3.70         | 0.98                                             | 5.236622      | 2.319831      | 7.374463      | 4.523111      | -0.650416     | -0.319182                             | 0.691337                              |
| H527 | 2020-09c | ETH-2            | 3.50         | 0.99                                             | -6.461478     | -14.670482    | -21.704264    | -30.247894    | -0.482993     | -0.725055                             | 0.247154                              |
| H528 | 2020-09c | ETH-1            | 3.66         | 1.01                                             | 5.508815      | 1.863335      | 6.801203      | 3.590568      | -0.147512     | -0.719613                             | 0.250024                              |
| H529 | 2020-09c | ETH-3            | 3.81         | 0.98                                             | 5.218967      | 2.297286      | 7.352280      | 4.597594      | -0.286086     | -0.300975                             | 0.711409                              |
| H530 | 2020-09c | ETH-2            | 3.67         | 0.99                                             | -6.463877     | -14.659110    | -21.688277    | -30.120804    | -0.707788     | -0.717575                             | 0.255397                              |
| H531 | 2020-09c | ETH-3            | 3.74         | 0.96                                             | 5.209784      | 2.259127      | 7.282450      | 4.472123      | -0.459082     | -0.323434                             | 0.686661                              |
| H532 | 2020-09c | ETH-1            | 3.66         | 1.02                                             | 5.533332      | 1.884829      | 6.852064      | 3.663437      | 1.331376      | -0.715346                             | 0.254722                              |
| H533 | 2020-09c | NB_A10_V1        | 3.93         | 0.98                                             | 5.983299      | 0.702605      | 6.458903      | 1.411789      | 0.977635      | -0.406736                             | 0.594931                              |
| H534 | 2020-09c | NB_A14_V1        | 3.98         | 0.95                                             | 6.596492      | 4.521981      | 10.898894     | 9.025886      | 1.553004      | -0.379004                             | 0.625012                              |
| H535 | 2020-09c | ETH-3            | 3.75         | 0.96                                             | 5.221385      | 2.257558      | 7.295291      | 4.545868      | 1.865920      | -0.321054                             | 0.689283                              |
| H536 | 2020-09c | NB_CIN23_V1      | 3.69         | 0.97                                             | 5.331160      | 3.604370      | 8.680217      | 7.178321      | 1.560920      | -0.380023                             | 0.624133                              |
| H537 | 2020-09c | NB_CIN25_V1prime | 3.83         | 0.97                                             | 5.556693      | 5.688888      | 10.947631     | 11.359826     | 1.346501      | -0.405996                             | 0.595254                              |
| H538 | 2020-09c | ETH-2            | 3.71         | 1.00                                             | -6.464537     | -14.708946    | -21.744812    | -30.349591    | 2.277445      | -0.724950                             | 0.247274                              |
| H539 | 2020-09c | NB_CIN26_V1      | 3.62         | 0.99                                             | 5.565033      | 6.129442      | 11.392080     | 12.371515     | 1.901539      | -0.405602                             | 0.595640                              |
| H540 | 2020-09c | NB_CIN27_V1      | 3.64         | 0.97                                             | 4.855031      | 3.578407      | 8.154278      | 7.104954      | 1.677654      | -0.387422                             | 0.616034                              |
| H541 | 2020-09c | ETH-3            | 3.74         | 0.97                                             | 5.232322      | 2.258958      | 7.309650      | 4.447663      | 1.686285      | -0.319396                             | 0.691109                              |
| H542 | 2020-09c | NB_CIN28a_V1     | 3.77         | 1.00                                             | 5.302514      | 3.975935      | 8.991848      | 7.992846      | 0.960578      | -0.405649                             | 0.595852                              |
| H543 | 2020-09c | NB_CIN28b_V1     | 3.59         | 0.90                                             | 5.632578      | 5.989850      | 11.319926     | 12.069001     | 1.584480      | -0.409828                             | 0.590990                              |
| H544 | 2020-09c | ETH-1            | 3.69         | 1.01                                             | 5.534326      | 1.828767      | 6.813753      | 3.530096      | 1.723684      | -0.699410                             | 0.272292                              |
| H545 | 2020-09c | NB_CIN7_V1       | 3.69         | 0.97                                             | 5.995719      | 4.827861      | 10.565126     | 9.616466      | 1.450980      | -0.392659                             | 0.609997                              |
| H546 | 2020-09c | NB_CIN25_FAILLE  | 3.93         | 1.01                                             | 5.639046      | 5.784199      | 11.134036     | 11.737260     | 1.884114      | -0.399291                             | 0.602625                              |
| H547 | 2020-09c | ETH-3            | 3.74         | 0.96                                             | 5.233196      | 2.246712      | 7.295213      | 4.396743      | 1.941511      | -0.322612                             | 0.687566                              |
| H548 | 2020-09c | ETH-2            | 3.78         | 0.98                                             | -6.456484     | -14.662393    | -21.668489    | -30.149274    | 0.705186      | -0.701761                             | 0.272826                              |

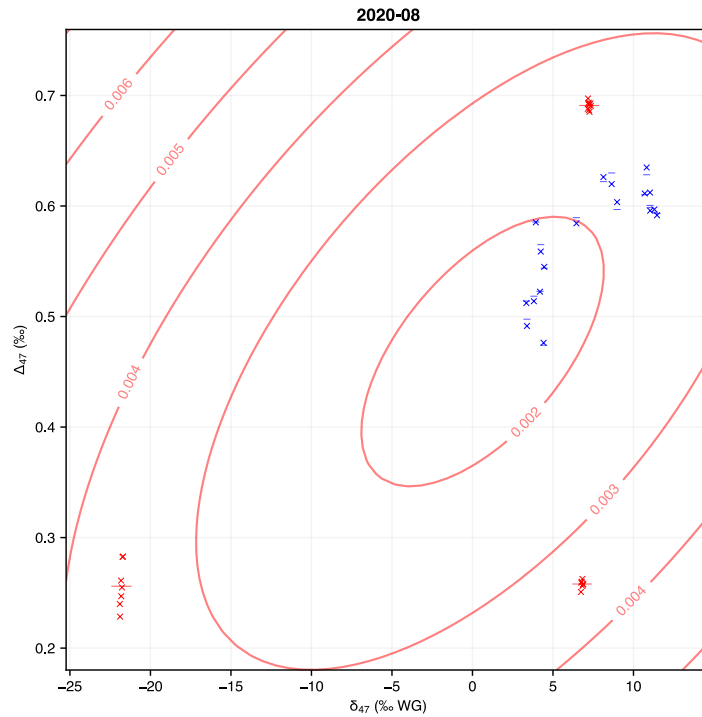

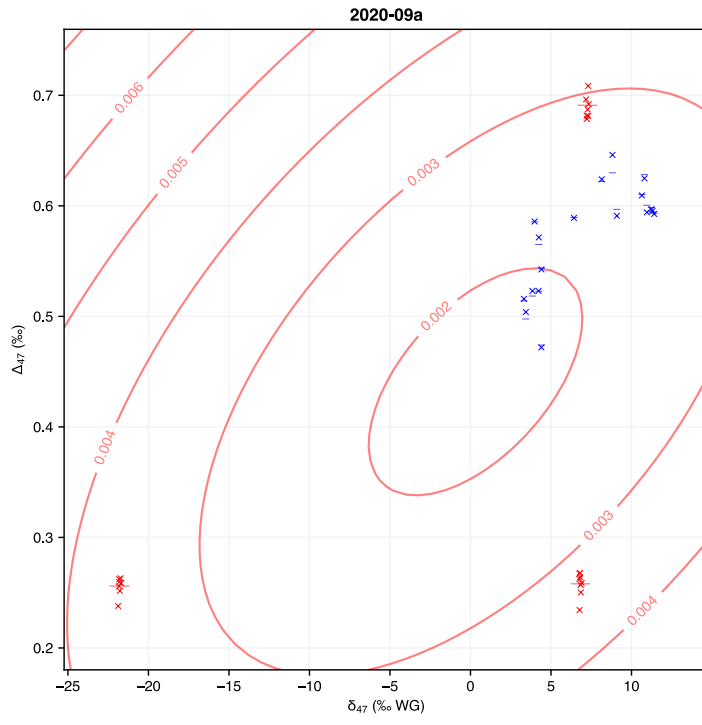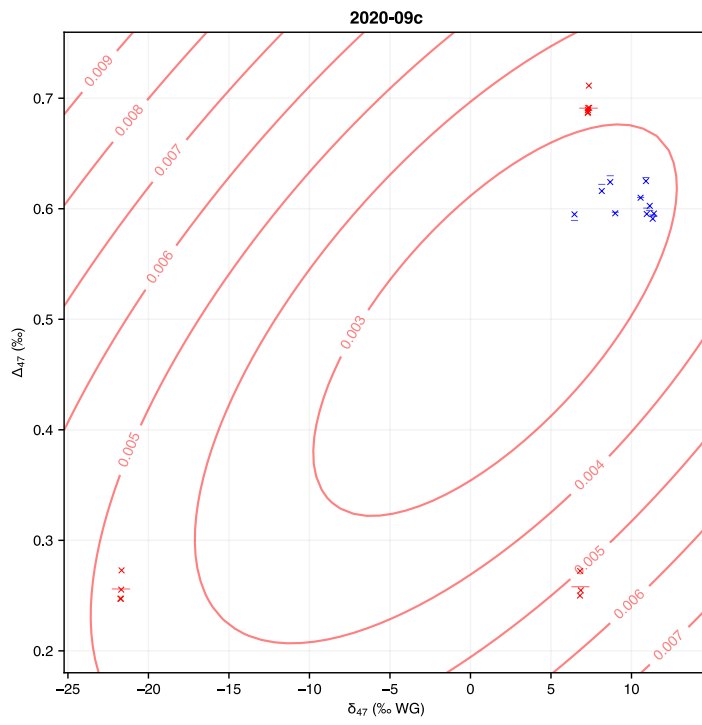

Supplement: s1 [file s1]
