# Supplementary material
Source: MDPI journal article supplement (https://www.mdpi.com/2076-3263/11/3/135)

Sample : CIN13\_BSP1

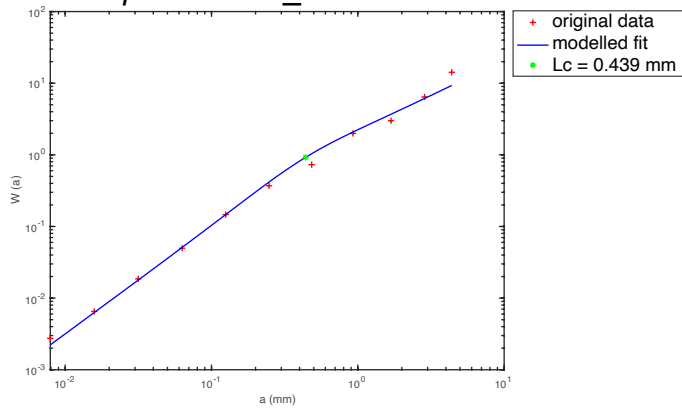

Sample : CIN13\_BSP3b

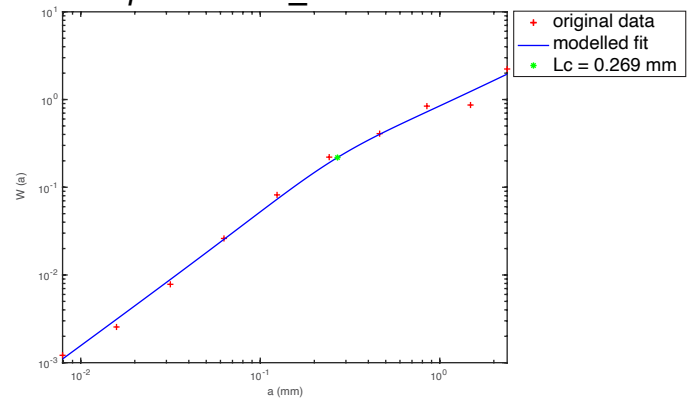

Sample : CIN13\_BSP2a

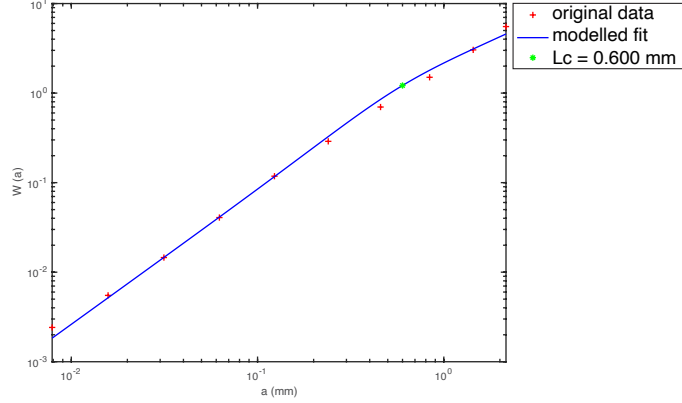

Sample : CIN13\_BSP4

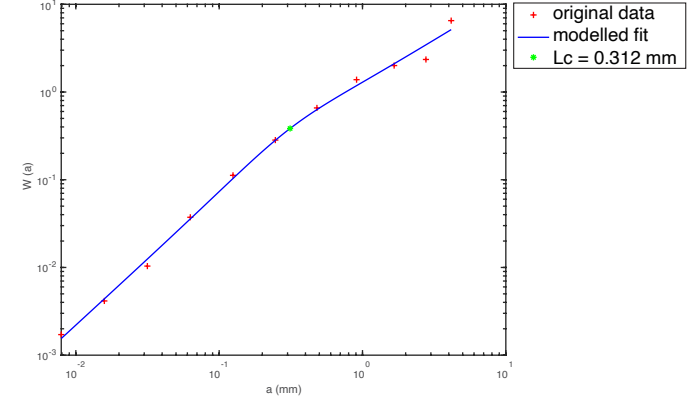

Sample : CIN13\_BSP2b

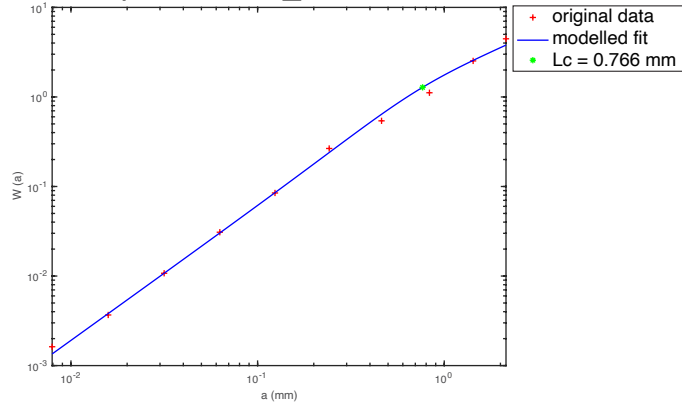

Sample : CIN14\_BSP1

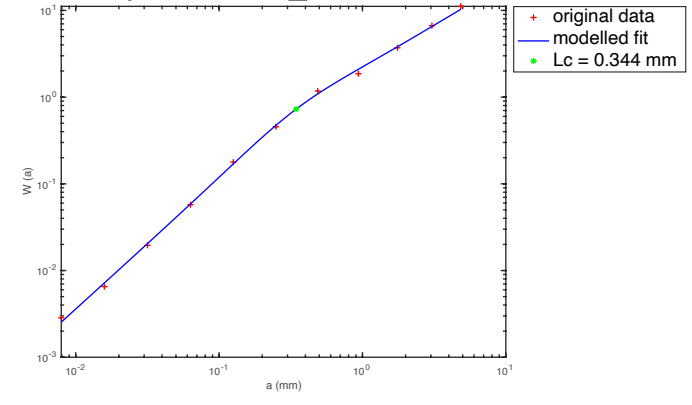

Sample : CIN13\_BSP2c

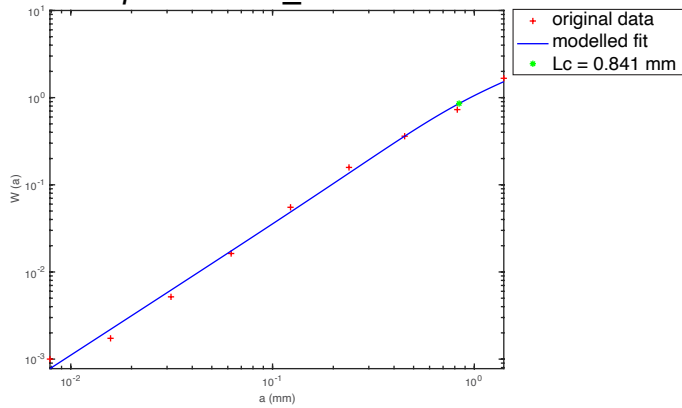

Sample : CIN14\_BSP9

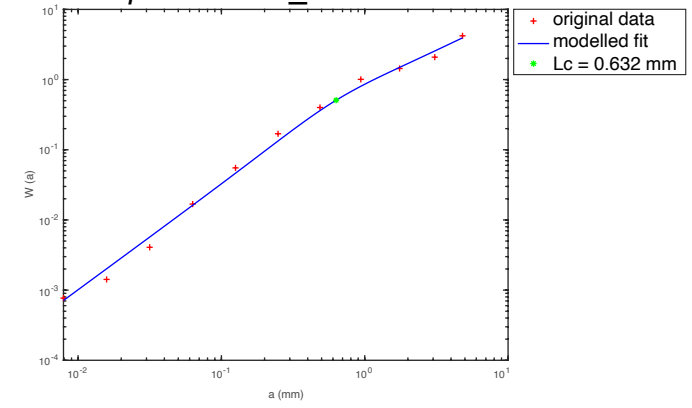

Sample : CIN13\_BSP3a

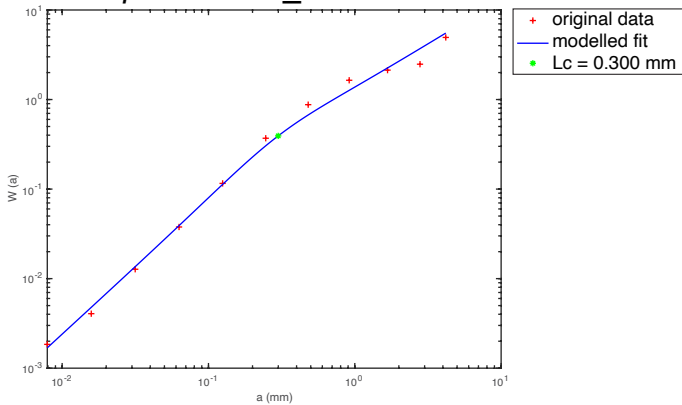

Sample : CIN3\_BSP1

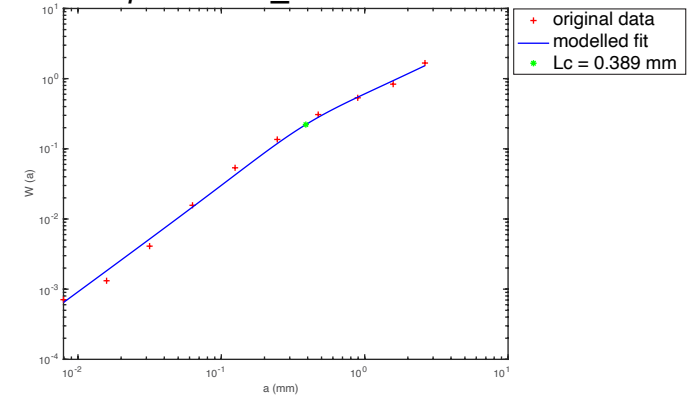

**Sample : CIN3\_BSP2**

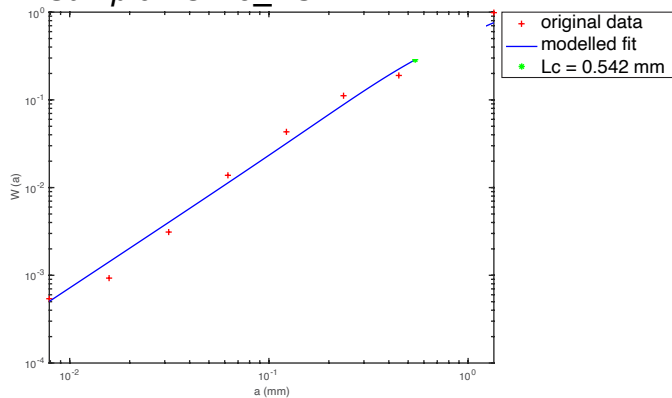

**Sample : CIN8\_BSP2**

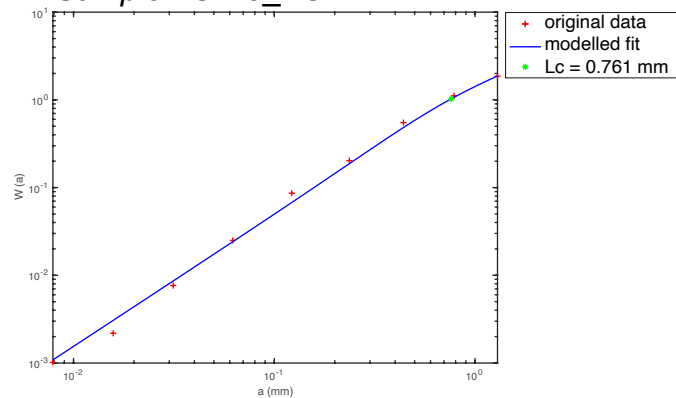

**Sample : CIN3\_BSP3**

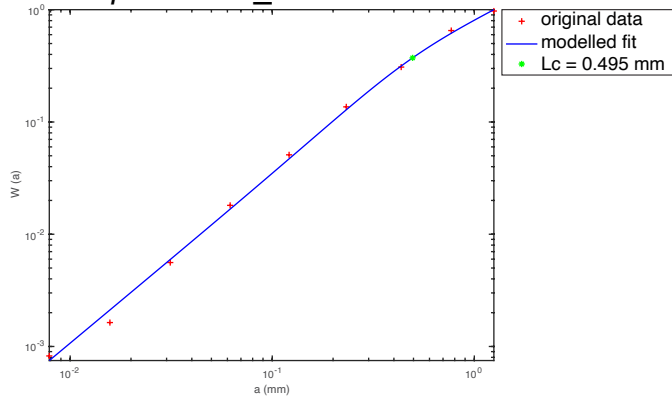

**Sample : CIN9**

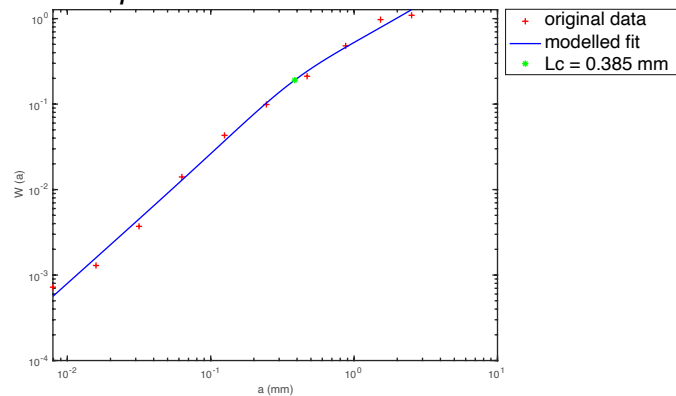

**Sample : CIN6\_BSP1**

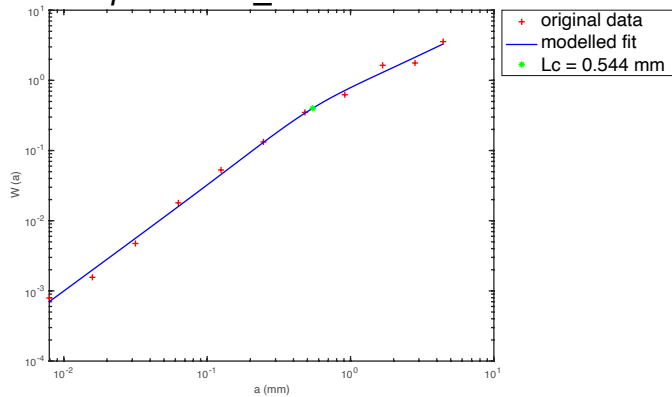

**Sample : CIN10\_A1\_BPS1b**

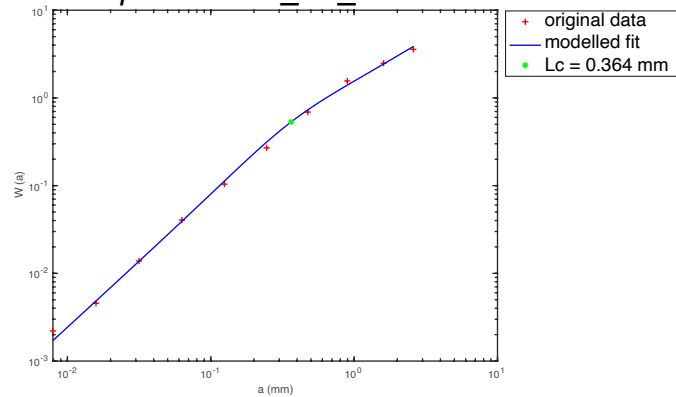

**Sample : CIN6\_BSP2**

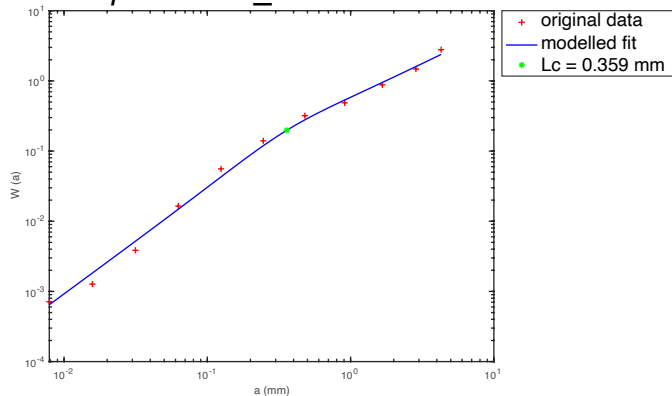

**Sample : CIN10\_A1\_BPS3**

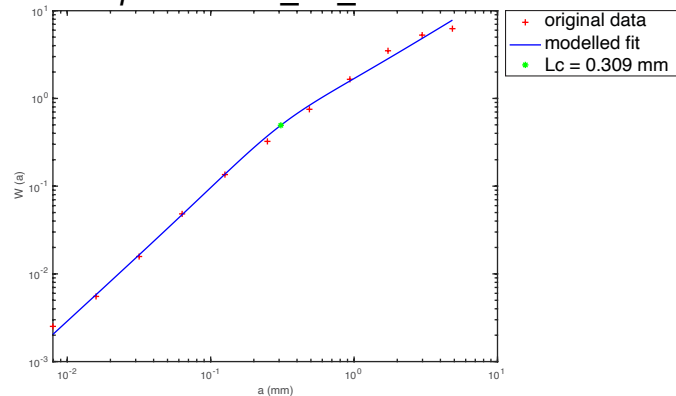

**Sample : CIN8\_BSP1**

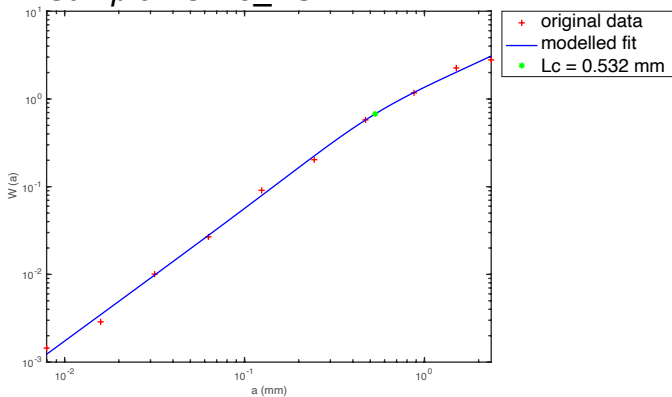

**Sample : CIN10\_A2\_BPS3**

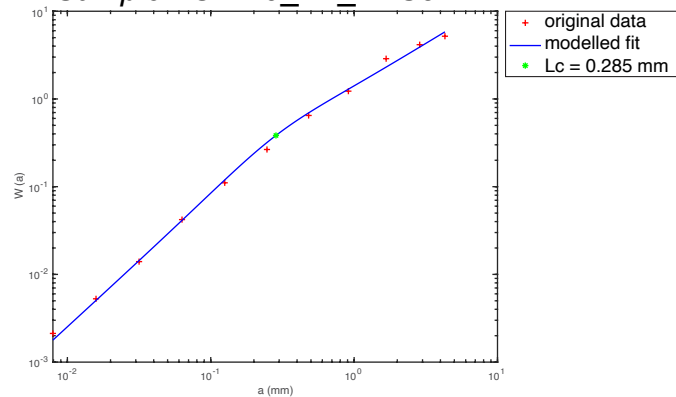

**Sample : CIN15\_A1\_BSP1**

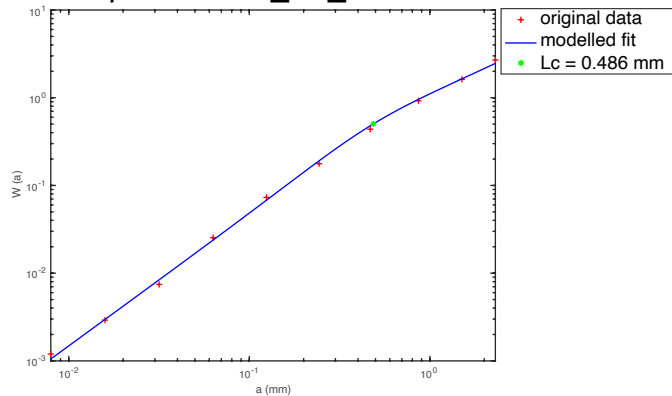

**Sample : CIN18\_A2\_BSP2**

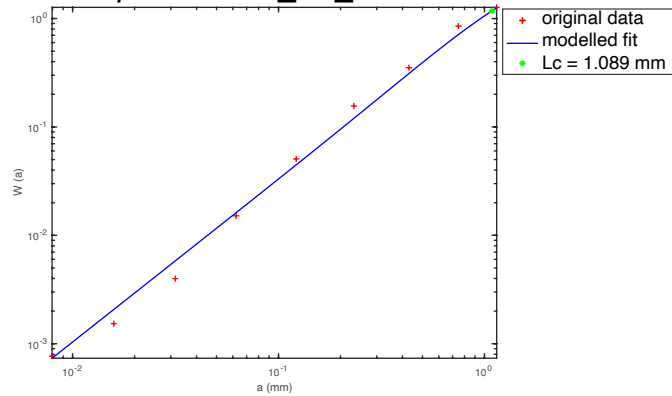

**Sample : CIN15\_A2\_BSP1**

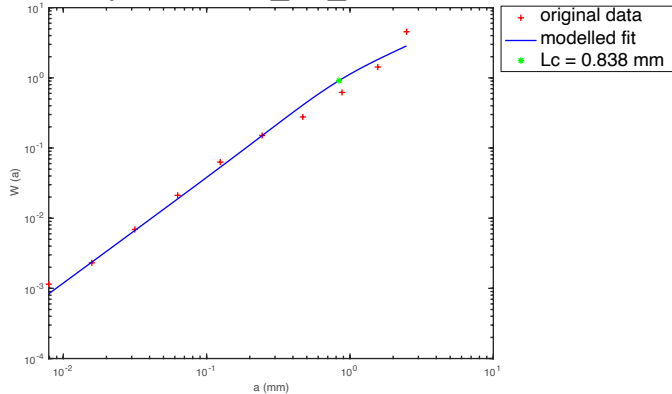

**Sample : CIN17\_BPS2**

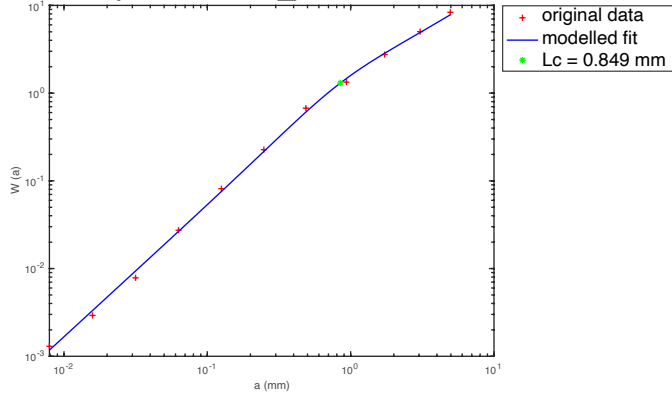

**Sample : CIN15\_A3**

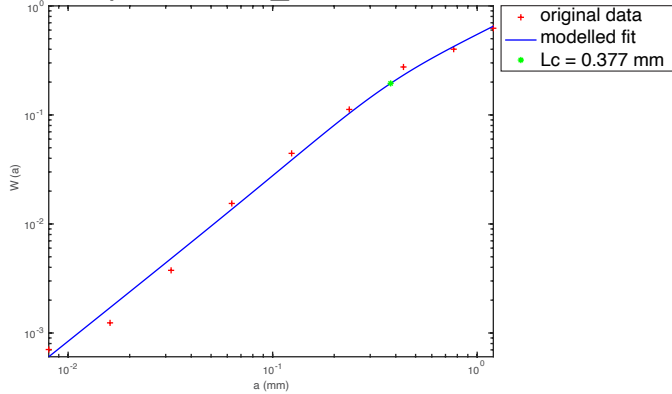

**Sample : CIN33\_A\_BPS1**

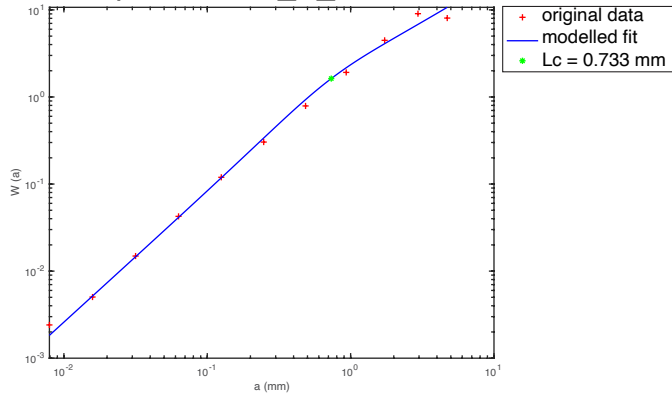

**Sample : CIN18\_A1**

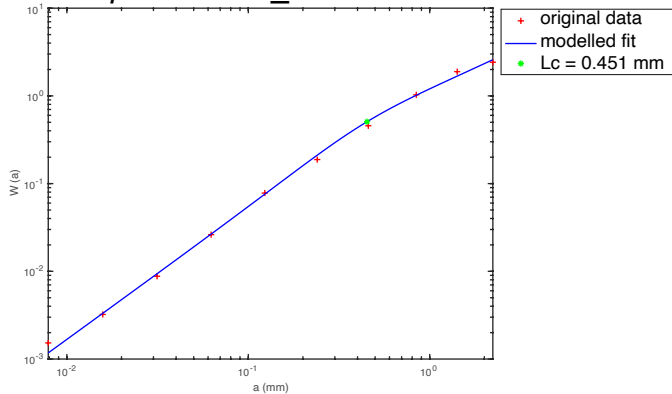

**Sample : CIN33\_A\_BPS2**

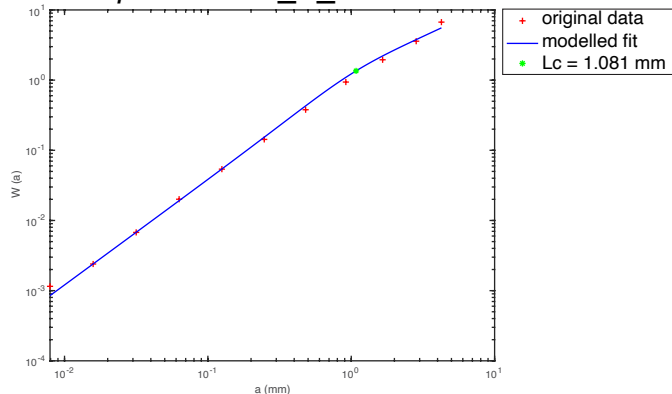

**Sample : CIN18\_A2\_BSP1**

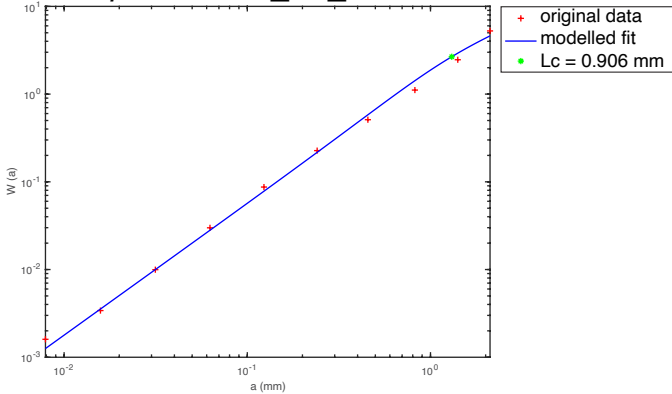

**Sample : CIN33\_A\_BPS3**

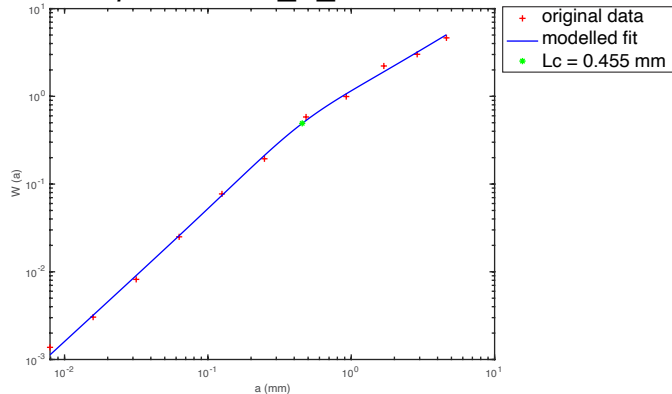

Sample : CIN33\_B

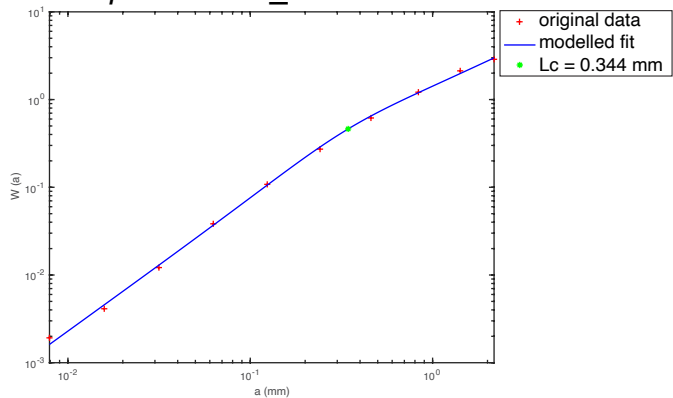

Sample : CIN40\_B\_BSP3

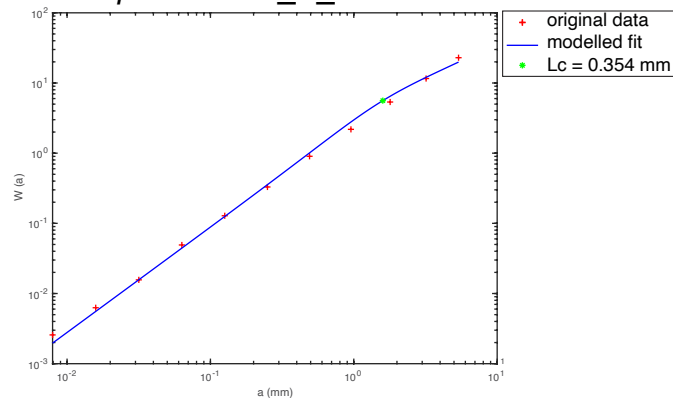

Sample : CIN40\_A\_BSP1

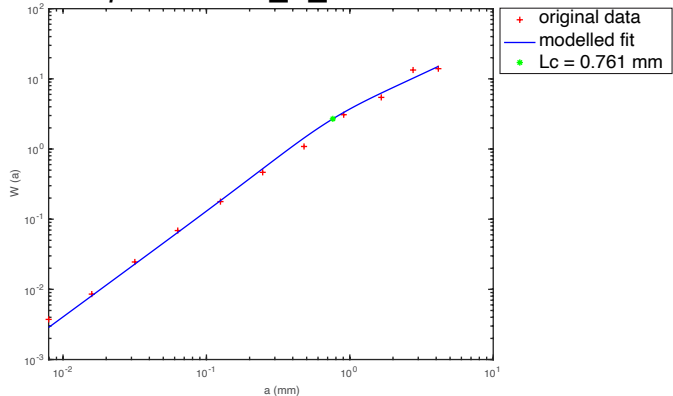

Sample : CIN38\_BPS1

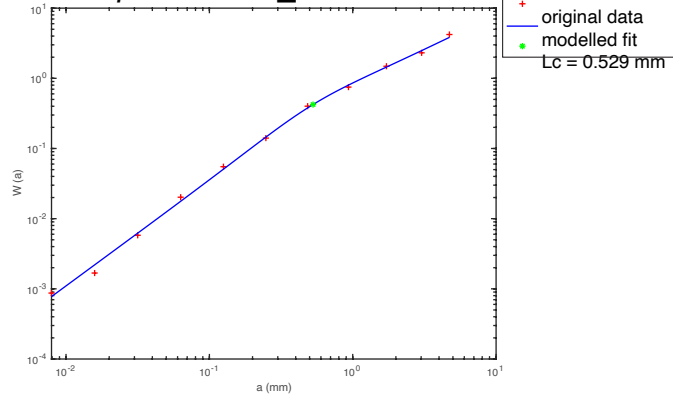

Sample : CIN40\_A\_BPS2

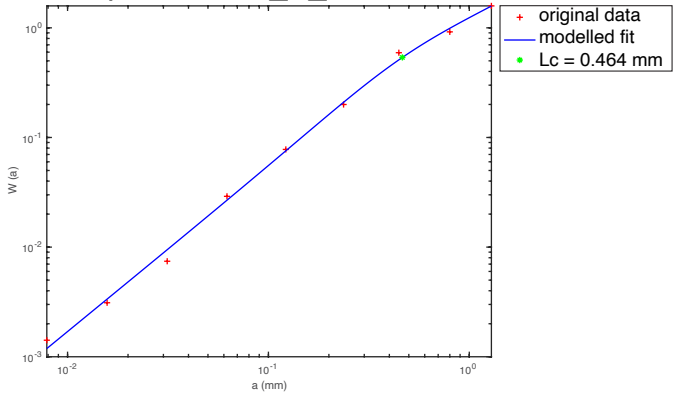

Sample : CIN38\_BPS3

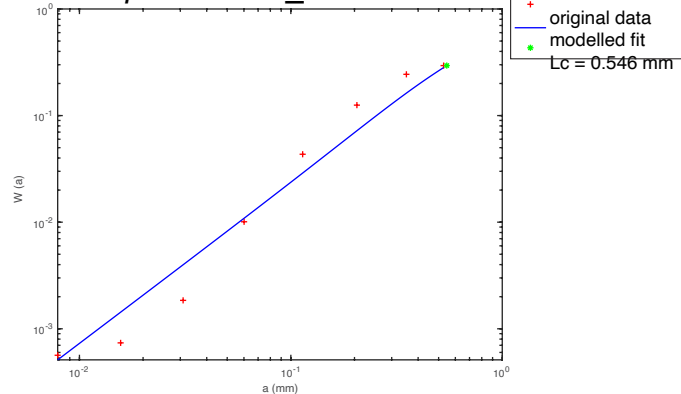

Sample : CIN40\_B\_BPS1

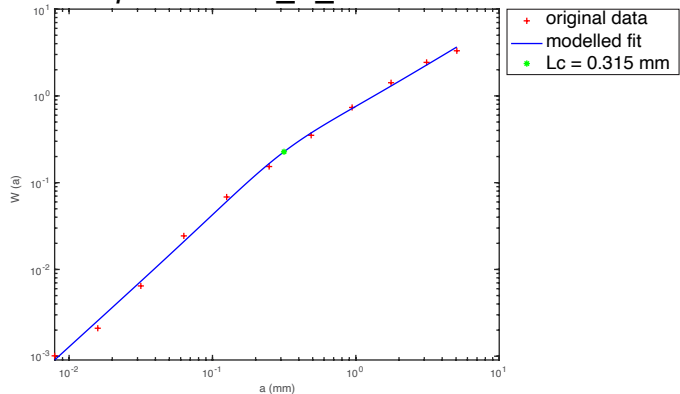

Sample : C51\_BPS1

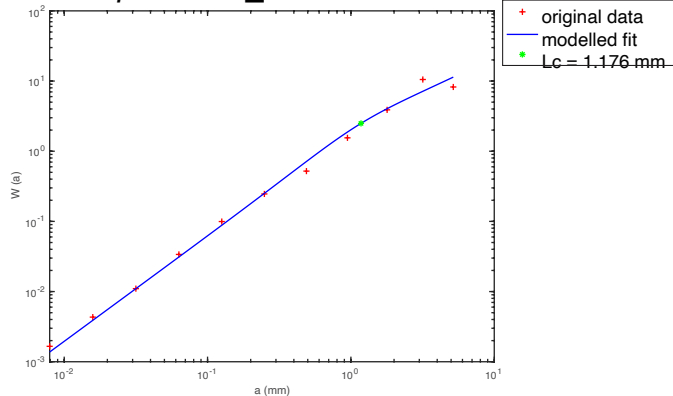

Sample : CIN40\_B\_BSP2

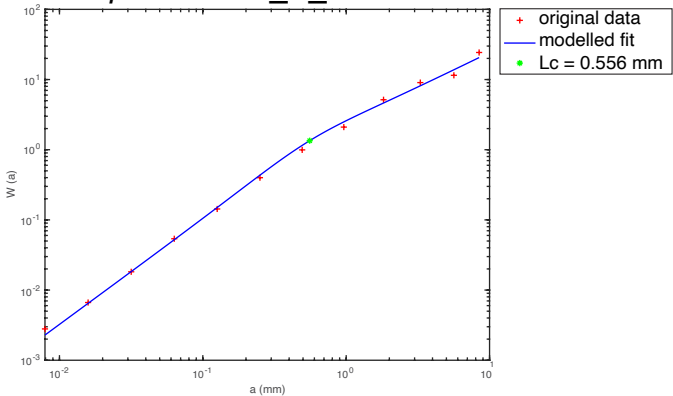

Sample : C51\_BPS2

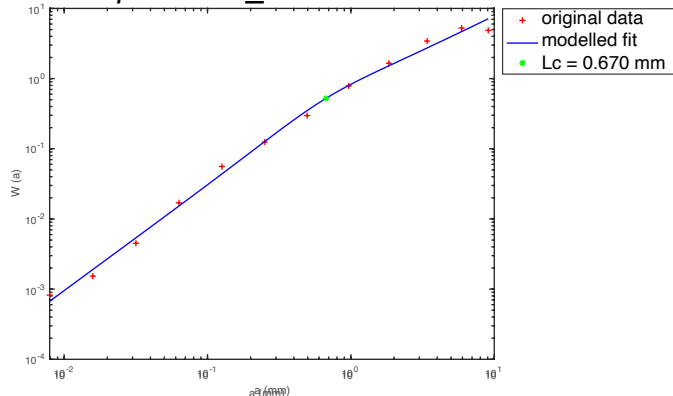

Sample : C67'\_BPS1

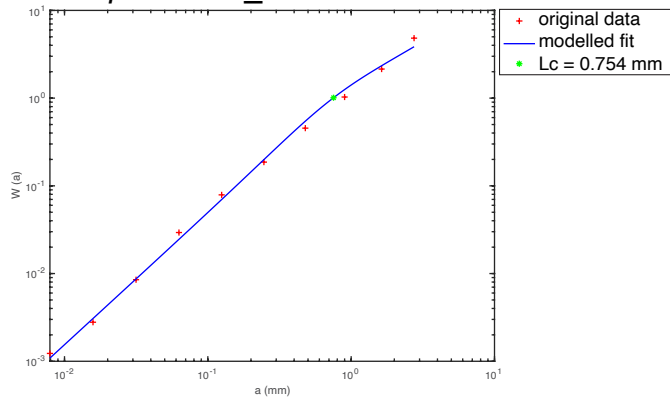

Sample : C70\_BPS1

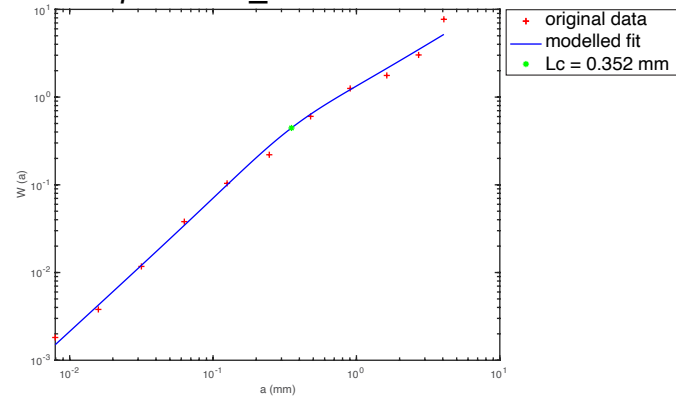

Sample : C67'\_BPS2

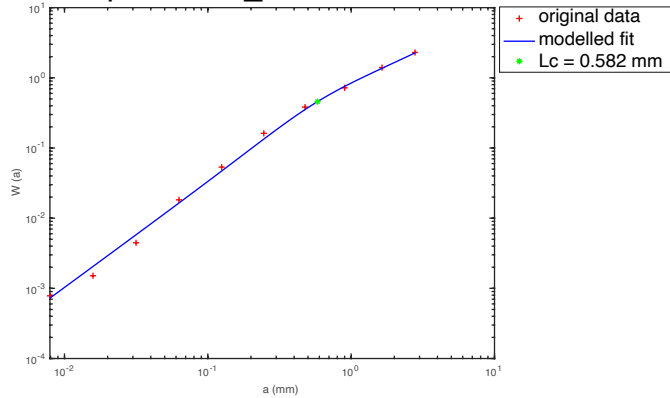

Sample : C70\_BPS2

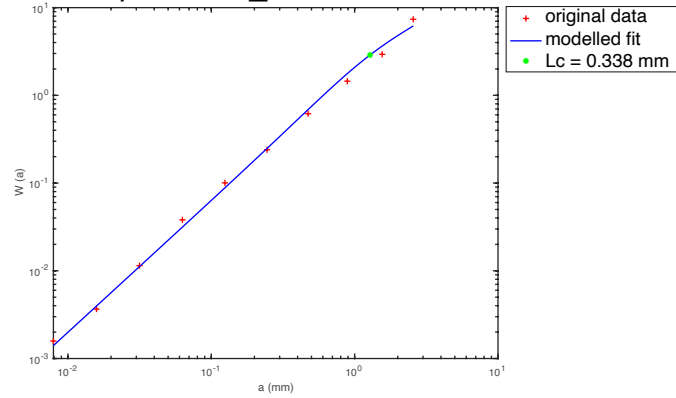

Sample : C68

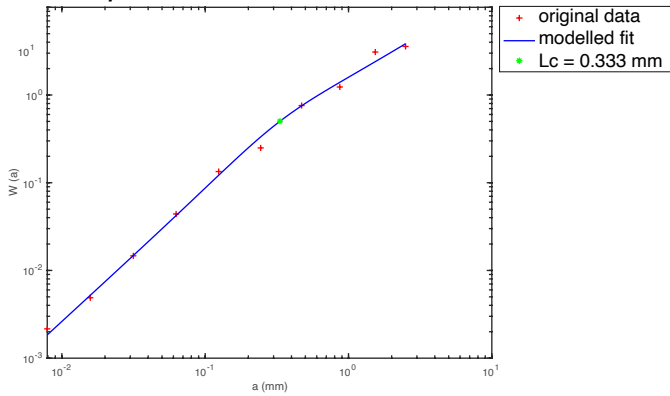

Sample : C71

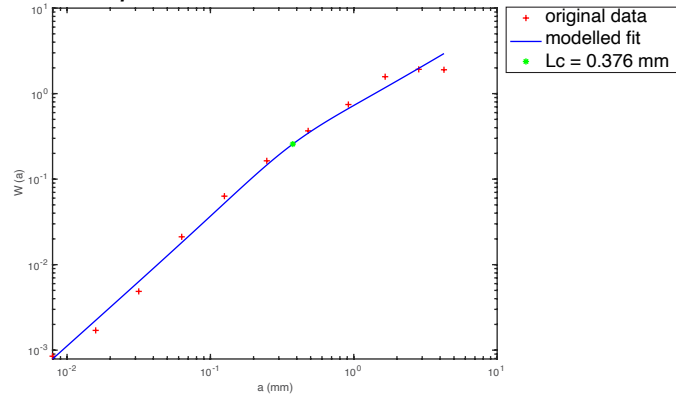

Sample : C69\_BPS1

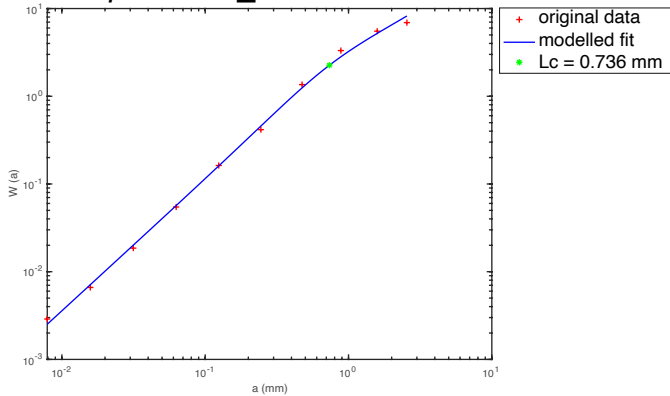

Sample : C72\_A\_BPS1

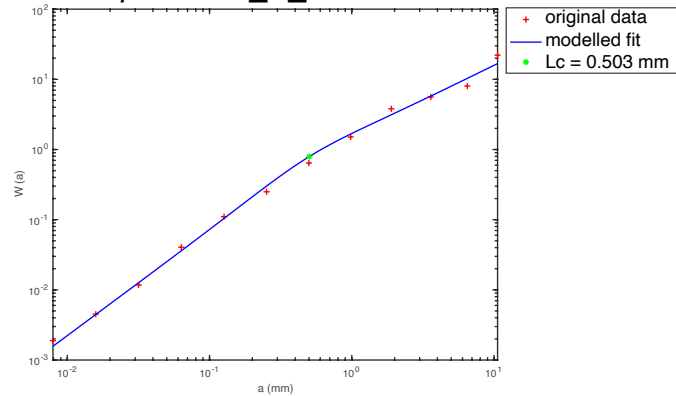

Sample : C69\_BPS2

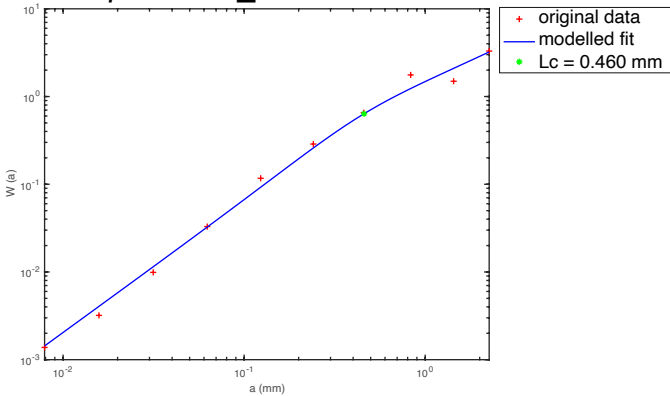

Sample : C56

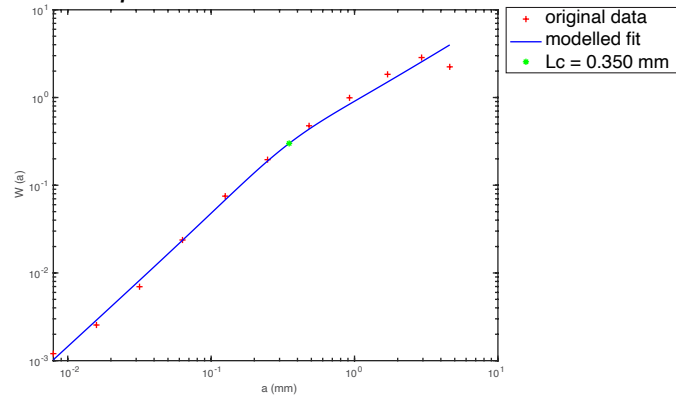

Sample : C3\_B\_BPS1

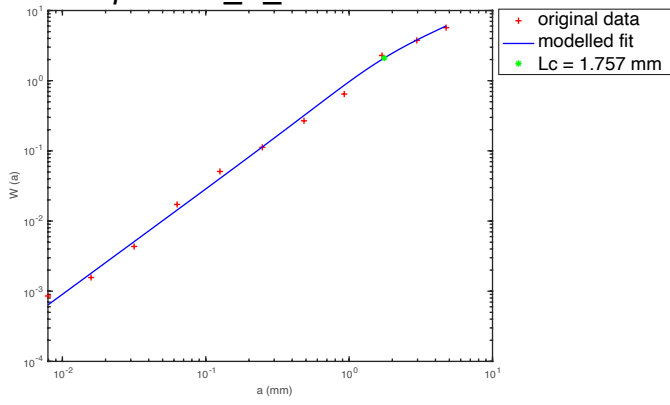

Sample : C86\_B

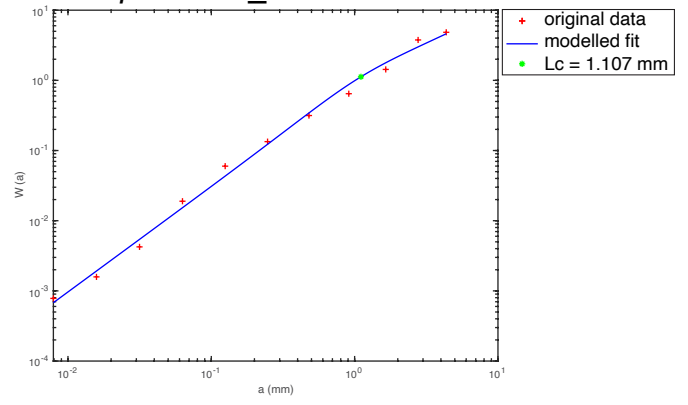

Sample : C3\_B\_BPS2

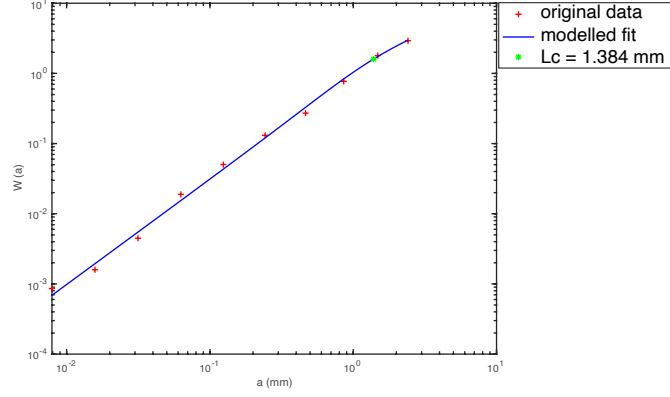

Sample : C26\_A

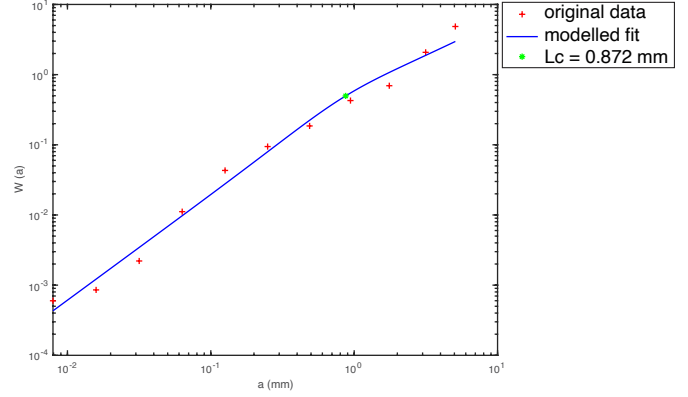

Sample : C86\_A\_BPS1

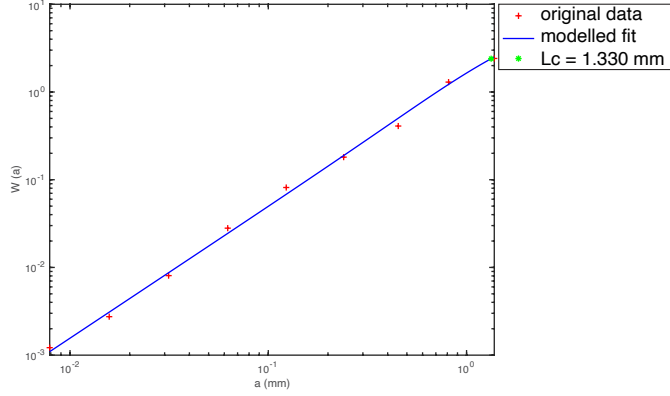

Sample : C26\_B\_BPS1

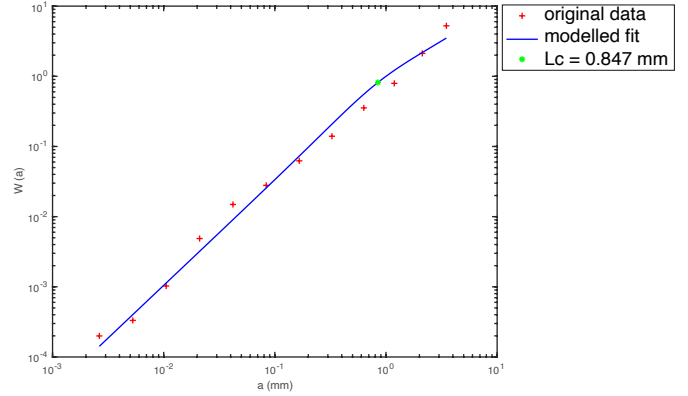

Sample : C86\_A\_BPS2

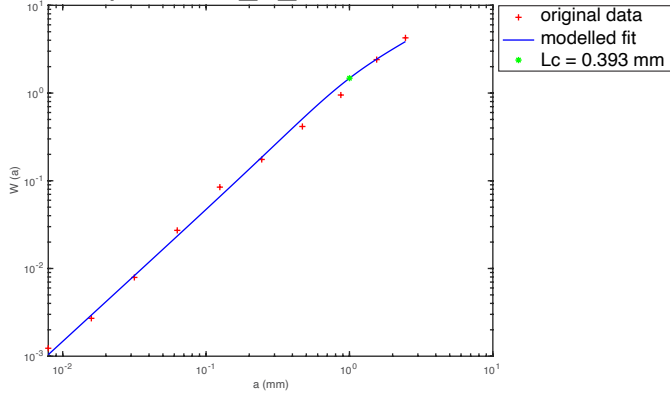

Sample : C26\_B\_BPS2

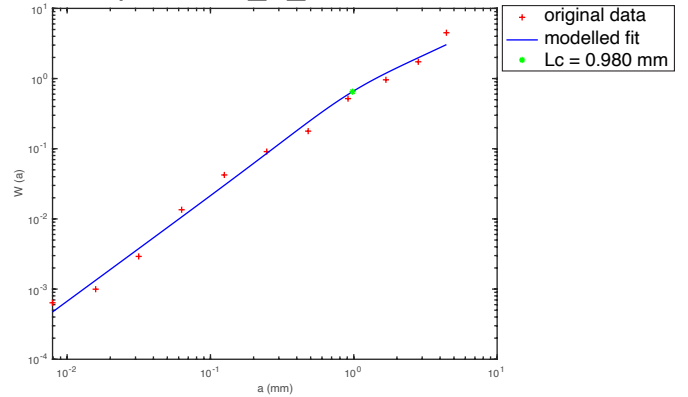

Sample : C86\_A\_BPS3

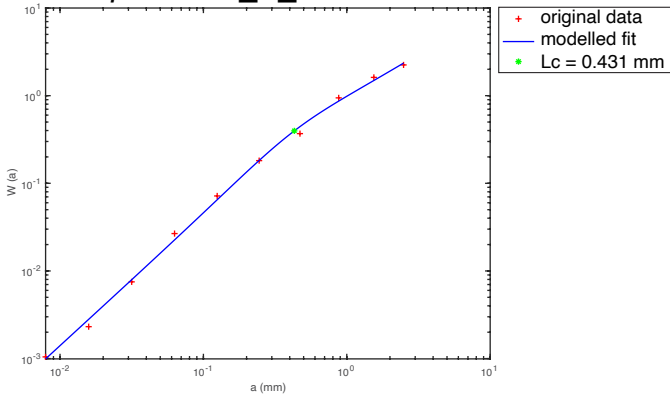

Sample : C28\_BPS2

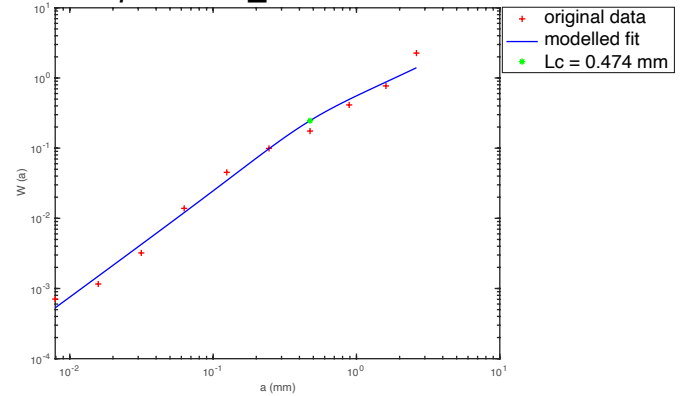

Sample : C29\_A

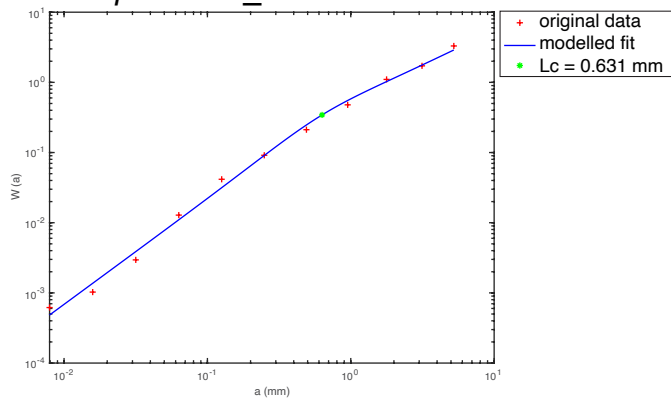

Sample : C30\_BPS3

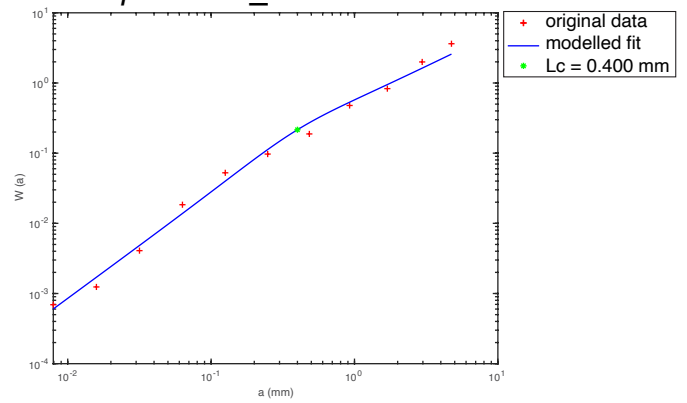

Sample : C29\_B\_BPS1

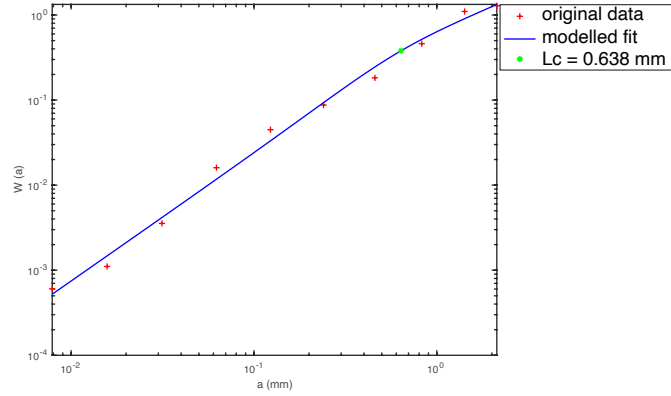

Sample : C79\_BPS2

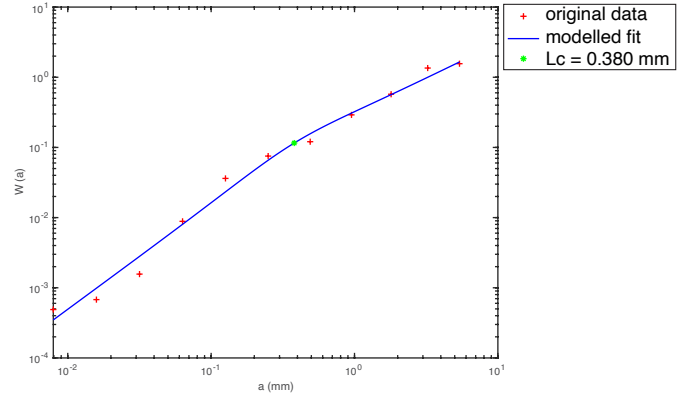

Sample : C29\_B\_BPS2

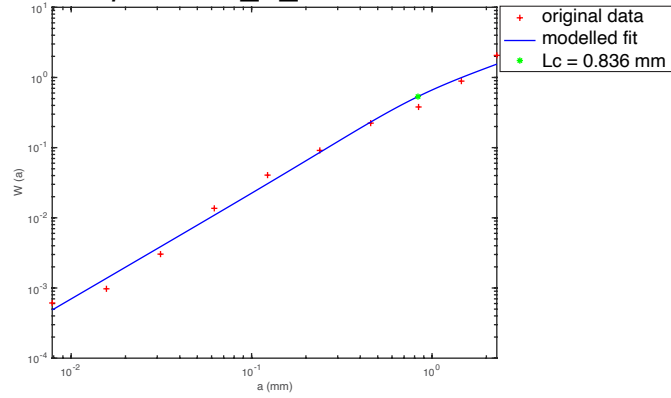

Sample : C15\_BPS1

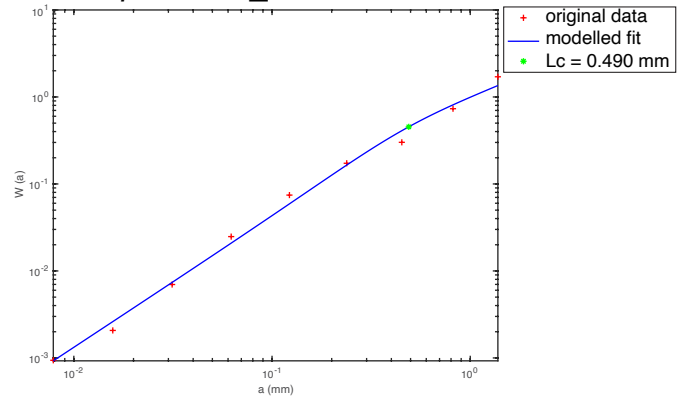

Sample : C30\_BPS1

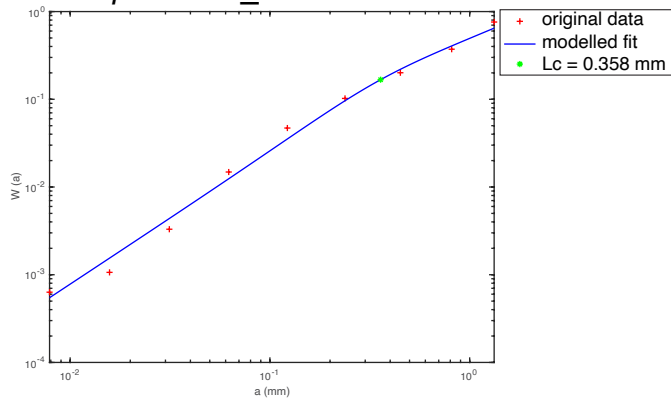

Sample : C15\_BPS2

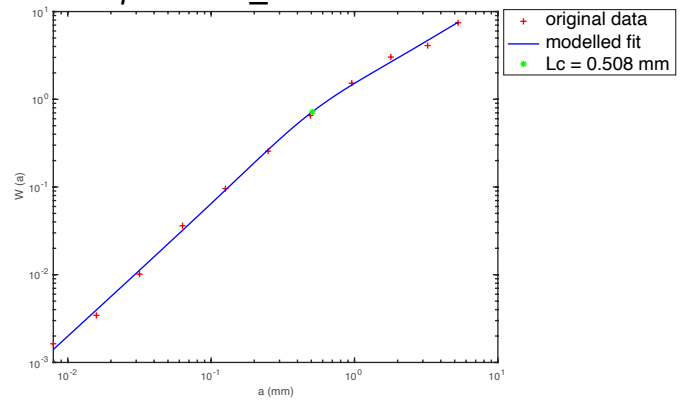

Sample : C30\_BPS2

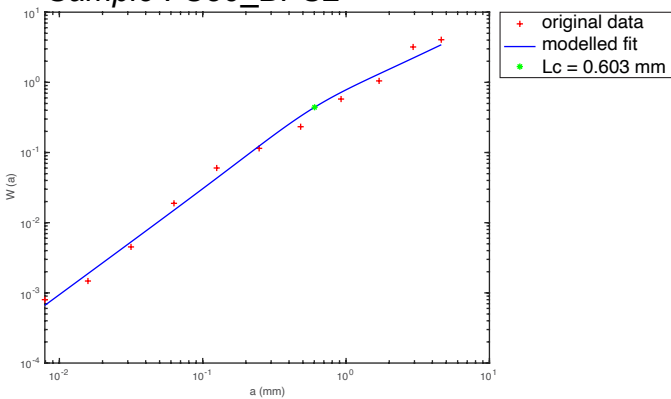

Sample : C87\_BPS1

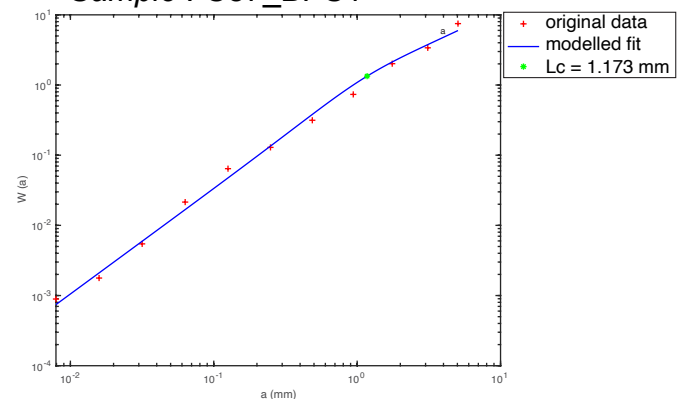

**Sample : C87\_BPS2**

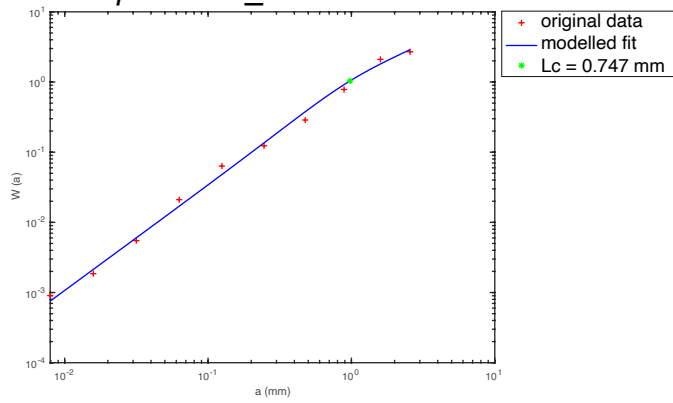

**Sample : C2\_A\_BPS1**

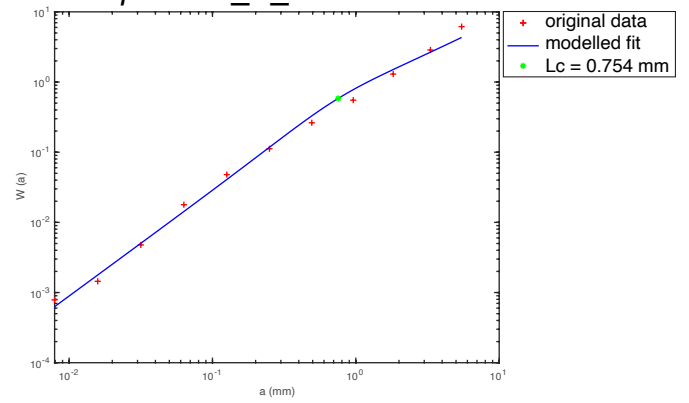

**Sample : C21\_BPS1**

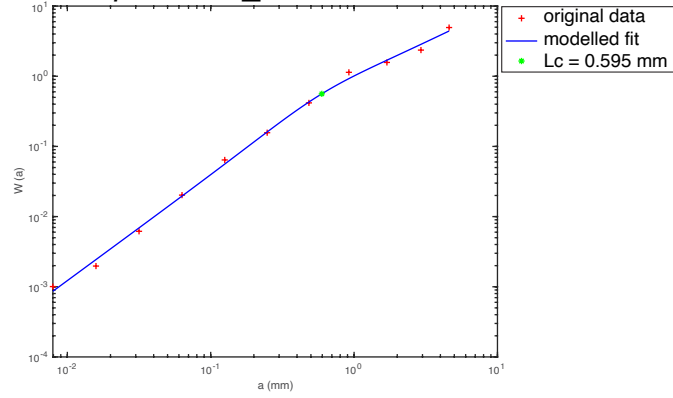

**Sample : C2\_A\_BPS2**

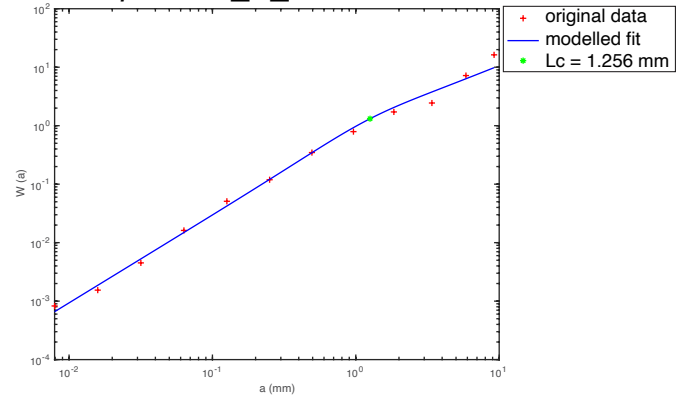

**Sample : C21\_BPS2**

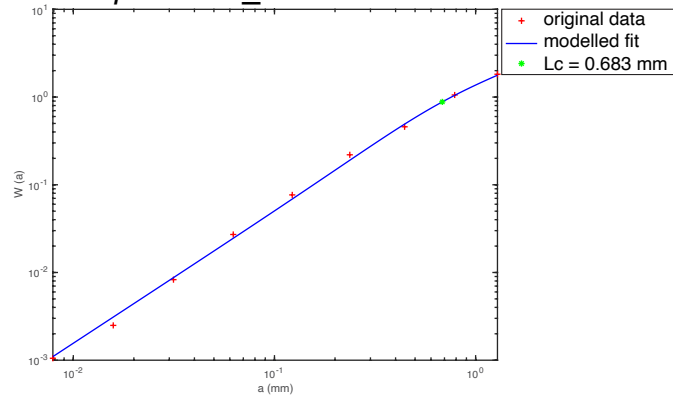

**Sample : C2\_B**

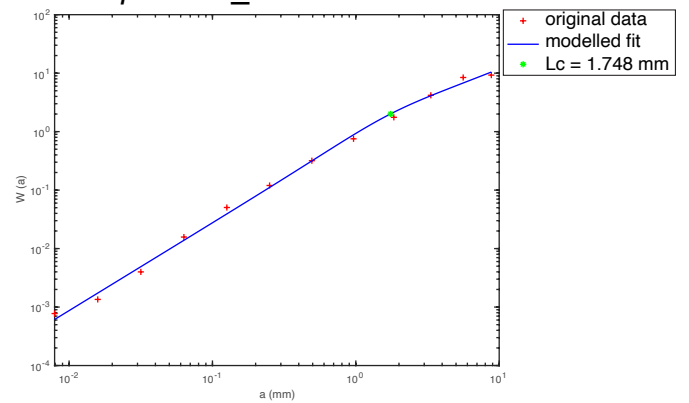

**Sample : C21\_BPS3**

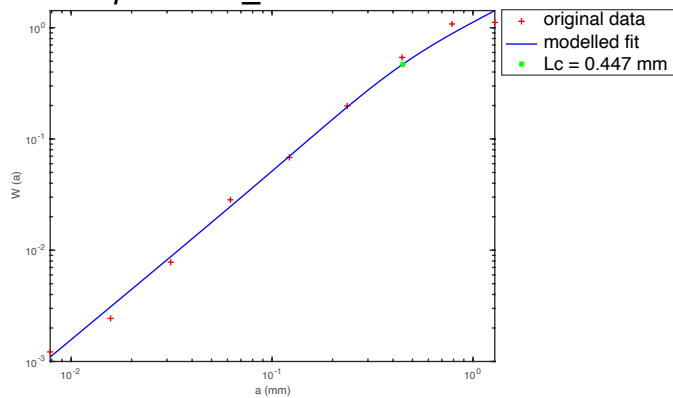

Supplement: s1 [file s1]
