# Supplementary material
Source: MDPI journal article supplement (https://www.mdpi.com/2076-3263/11/3/135)

## MAIOLICA

WP\_CIN3

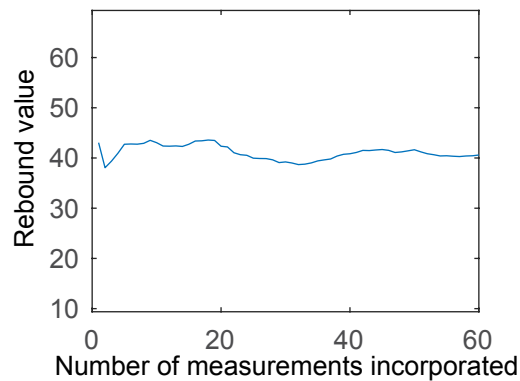

WP\_CIN23

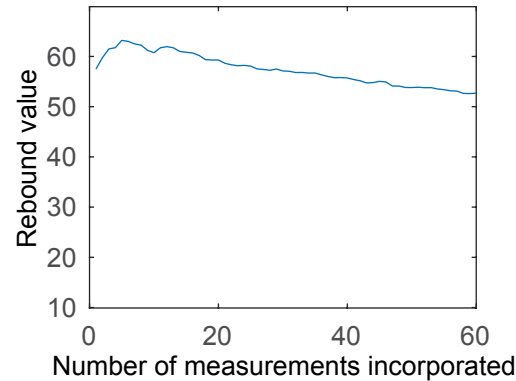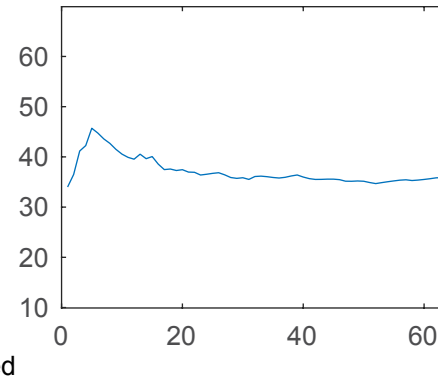

WP\_CIN29

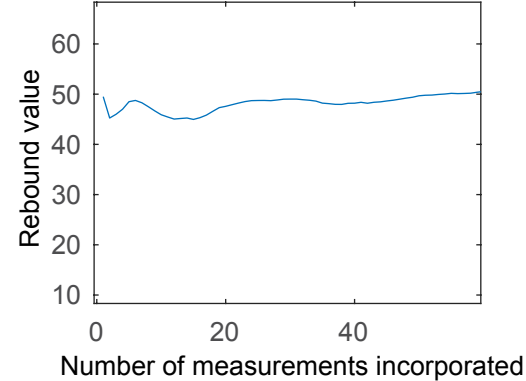

## SCAGLIA BIANCA

WP\_CIN6

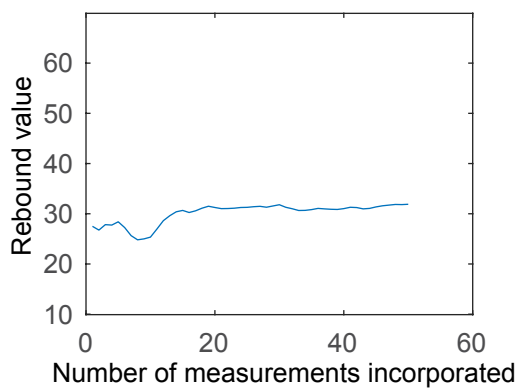

## SCAGLIA VARIEGATA

WP\_CIN4

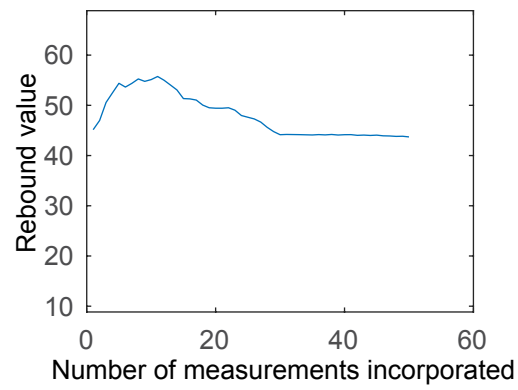

WP\_CIN27

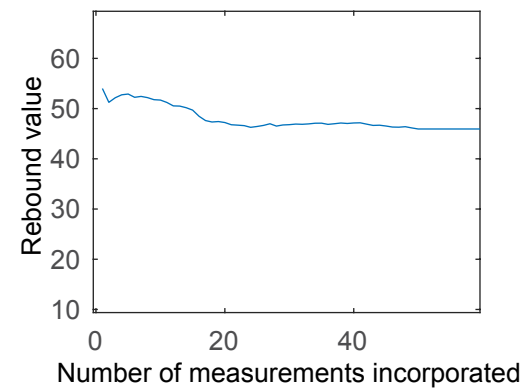

## SCAGLIA ROSSA

WP\_CIN5

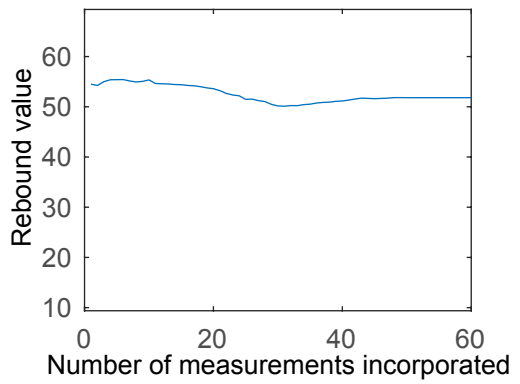

WP\_CIN7

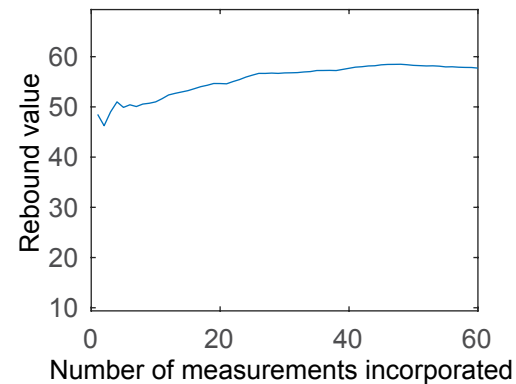

WP\_CIN8

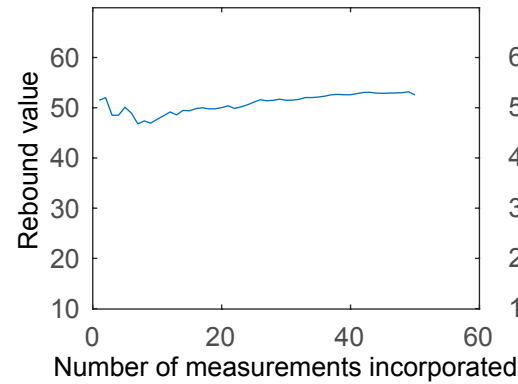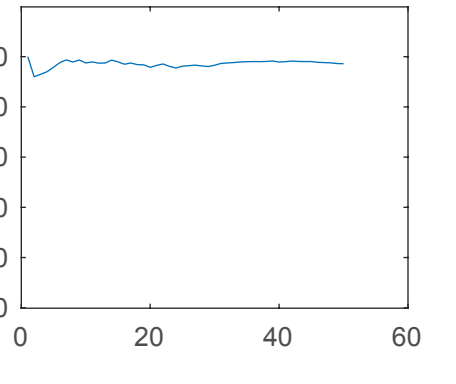

WP\_CIN13

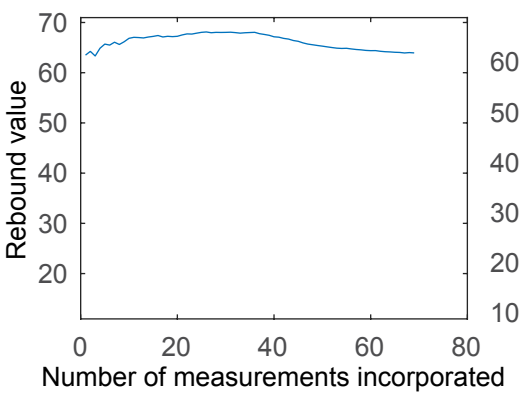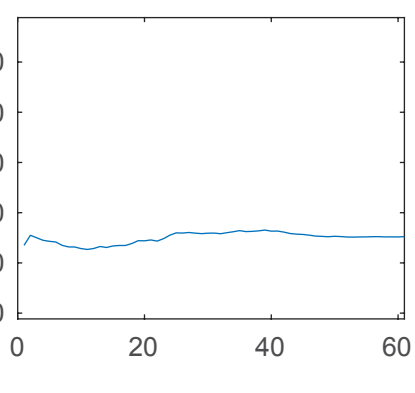

WP\_CIN25

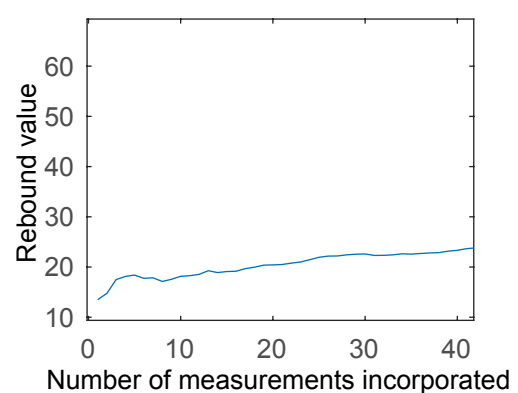

Supplement: s1 [file s1]
