# Supplementary material
Source: MDPI journal article supplement (https://www.mdpi.com/2076-3263/11/3/135)

NORTHERN BACKLIMB

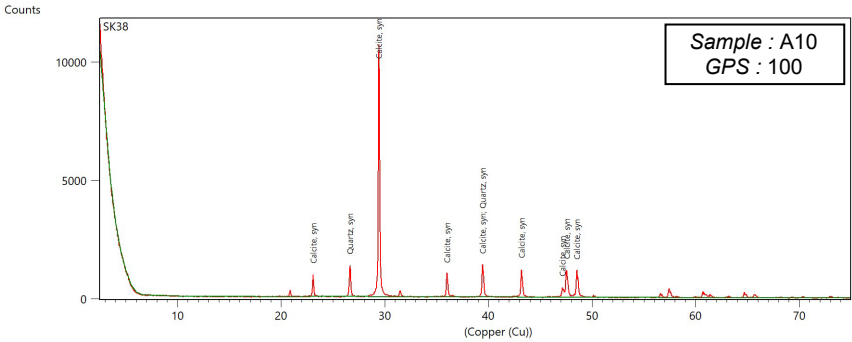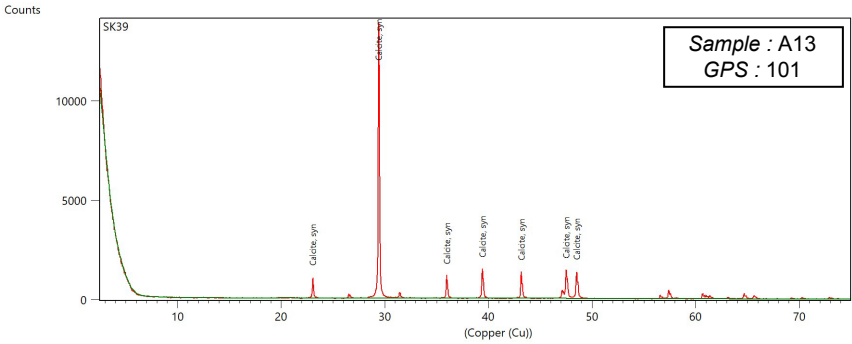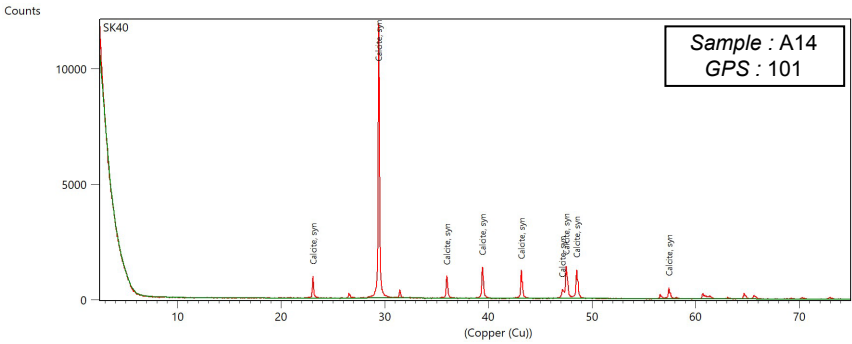

SOUTHERN BACKLIMB

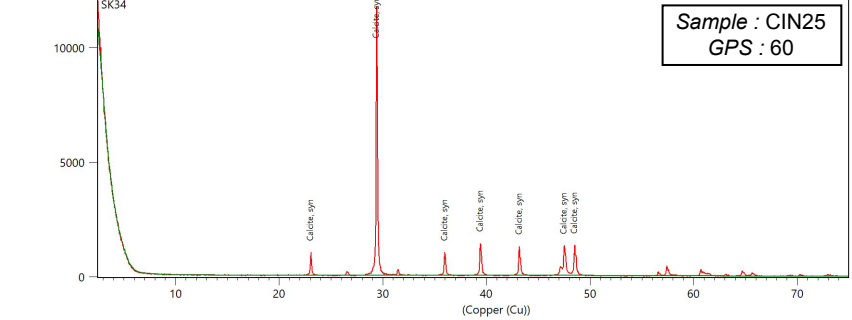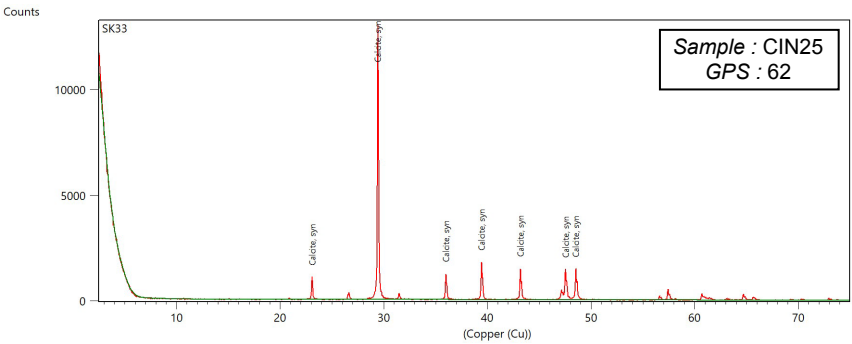

SOUTHERN FORELIMB

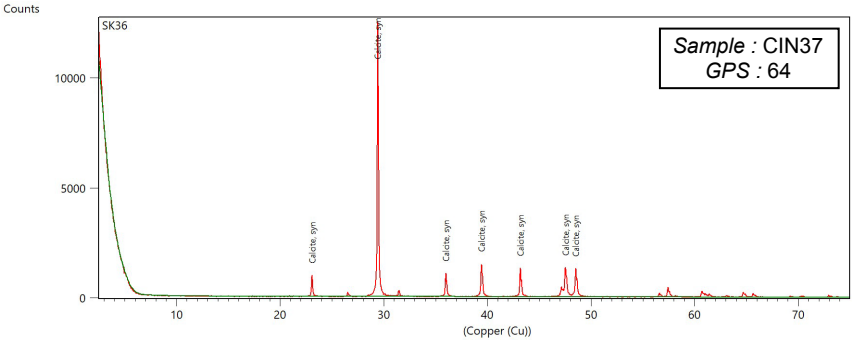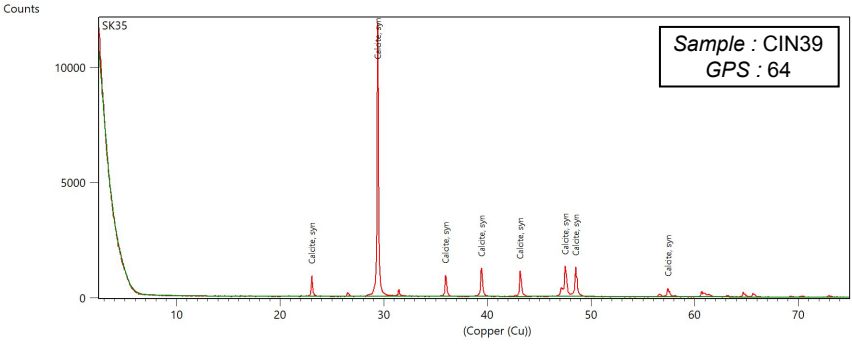

Supplement: s1 [file s1]
